# Supplementary material for: Niche Partitioning of Feather Mites within a Seabird Host, Calonectris borealis
Source: PLoS One. 2015 Dec 9;10(12):e0144728. doi: 10.1371/journal.pone.0144728 (PMC4682861; doi:10.1371/journal.pone.0144728)
Supplement: S1 Table — (XLS) [file pone.0144728.s007.xls]

## Sheet: Mite counts
Niche partitioning of feather mites within a seabird host, Calonectris borealis
Laura M. Stefan, Elena Gómez-Díaz, Eric Elguero, Heather C. Proctor, Karen D. McCoy, Jacob González-Solís
Table S7. Microspalax brevipes and Zachvatkinia ovata counts on the ten primaries (P1-P10) and six rectrices (R1-R6) for 60 birds. Primaries were divided into four equal regions: PPV – proximal posterior vane, DPV – distal posterior vane, PAV – proximal anterior vane, DAV – distal anterior vane, while rectrices were divided into two regions: AV – anterior vane and PV – posterior vane. In the ''mi…
bird ring	bird sex	bird weight	feather type	feather region	mite species	mites number
6134537	male	810	P1	DPV		777
6134537	male	810	P1	PPV		777
6134537	male	810	P1	DAV		777
6134537	male	810	P1	PAV		777
6134537	male	810	P2	DPV	Microspalax brevipes	0
6134537	male	810	P2	DPV	Zachvatkinia ovata	0
6134537	male	810	P2	PPV	Microspalax brevipes	1
6134537	male	810	P2	PPV	Zachvatkinia ovata	0
6134537	male	810	P2	DAV	Microspalax brevipes	0
6134537	male	810	P2	DAV	Zachvatkinia ovata	0
6134537	male	810	P2	PAV	Microspalax brevipes	0
6134537	male	810	P2	PAV	Zachvatkinia ovata	0
6134537	male	810	P3	DPV	Microspalax brevipes	61
6134537	male	810	P3	DPV	Zachvatkinia ovata	0
6134537	male	810	P3	PPV	Microspalax brevipes	6
6134537	male	810	P3	PPV	Zachvatkinia ovata	0
6134537	male	810	P3	DAV	Microspalax brevipes	2
6134537	male	810	P3	DAV	Zachvatkinia ovata	0
6134537	male	810	P3	PAV	Microspalax brevipes	1
6134537	male	810	P3	PAV	Zachvatkinia ovata	0
6134537	male	810	P4	DPV	Microspalax brevipes	999
6134537	male	810	P4	DPV	Zachvatkinia ovata	0
6134537	male	810	P4	PPV	Microspalax brevipes	7
6134537	male	810	P4	PPV	Zachvatkinia ovata	0
6134537	male	810	P4	DAV	Microspalax brevipes	16
6134537	male	810	P4	DAV	Zachvatkinia ovata	0
6134537	male	810	P4	PAV	Microspalax brevipes	0
6134537	male	810	P4	PAV	Zachvatkinia ovata	0
6134537	male	810	P5	DPV	Microspalax brevipes	999
6134537	male	810	P5	DPV	Zachvatkinia ovata	0
6134537	male	810	P5	PPV	Microspalax brevipes	11
6134537	male	810	P5	PPV	Zachvatkinia ovata	0
6134537	male	810	P5	DAV	Microspalax brevipes	13
6134537	male	810	P5	DAV	Zachvatkinia ovata	0
6134537	male	810	P5	PAV	Microspalax brevipes	20
6134537	male	810	P5	PAV	Zachvatkinia ovata	0
6134537	male	810	P6	DPV	Microspalax brevipes	999
6134537	male	810	P6	DPV	Zachvatkinia ovata	1
6134537	male	810	P6	PPV	Microspalax brevipes	25
6134537	male	810	P6	PPV	Zachvatkinia ovata	0
6134537	male	810	P6	DAV	Microspalax brevipes	18
6134537	male	810	P6	DAV	Zachvatkinia ovata	6
6134537	male	810	P6	PAV	Microspalax brevipes	4
6134537	male	810	P6	PAV	Zachvatkinia ovata	1
6134537	male	810	P7	DPV	Microspalax brevipes	999
6134537	male	810	P7	DPV	Zachvatkinia ovata	1
6134537	male	810	P7	PPV	Microspalax brevipes	38
6134537	male	810	P7	PPV	Zachvatkinia ovata	10
6134537	male	810	P7	DAV	Microspalax brevipes	7
6134537	male	810	P7	DAV	Zachvatkinia ovata	4
6134537	male	810	P7	PAV	Microspalax brevipes	3
6134537	male	810	P7	PAV	Zachvatkinia ovata	0
6134537	male	810	P8	DPV	Microspalax brevipes	999
6134537	male	810	P8	DPV	Zachvatkinia ovata	30
6134537	male	810	P8	PPV	Microspalax brevipes	22
6134537	male	810	P8	PPV	Zachvatkinia ovata	1
6134537	male	810	P8	DAV	Microspalax brevipes	0
6134537	male	810	P8	DAV	Zachvatkinia ovata	3
6134537	male	810	P8	PAV	Microspalax brevipes	0
6134537	male	810	P8	PAV	Zachvatkinia ovata	0
6134537	male	810	P9	DPV	Microspalax brevipes	999
6134537	male	810	P9	DPV	Zachvatkinia ovata	10
6134537	male	810	P9	PPV	Microspalax brevipes	6
6134537	male	810	P9	PPV	Zachvatkinia ovata	2
6134537	male	810	P9	DAV	Microspalax brevipes	0
6134537	male	810	P9	DAV	Zachvatkinia ovata	0
6134537	male	810	P9	PAV	Microspalax brevipes	1
6134537	male	810	P9	PAV	Zachvatkinia ovata	1
6134537	male	810	P10	DPV	Microspalax brevipes	0
6134537	male	810	P10	DPV	Zachvatkinia ovata	999
6134537	male	810	P10	PPV	Microspalax brevipes	0
6134537	male	810	P10	PPV	Zachvatkinia ovata	8
6134537	male	810	R1	PV	Microspalax brevipes	22
6134537	male	810	R1	PV	Zachvatkinia ovata	0
6134537	male	810	R1	AV	Microspalax brevipes	0
6134537	male	810	R1	AV	Zachvatkinia ovata	0
6134537	male	810	R2	PV	Microspalax brevipes	4
6134537	male	810	R2	PV	Zachvatkinia ovata	0
6134537	male	810	R2	AV	Microspalax brevipes	25
6134537	male	810	R2	AV	Zachvatkinia ovata	0
6134537	male	810	R3	PV	Microspalax brevipes	3
6134537	male	810	R3	PV	Zachvatkinia ovata	0
6134537	male	810	R3	AV	Microspalax brevipes	15
6134537	male	810	R3	AV	Zachvatkinia ovata	0
6134537	male	810	R4	PV	Microspalax brevipes	5
6134537	male	810	R4	PV	Zachvatkinia ovata	0
6134537	male	810	R4	AV	Microspalax brevipes	15
6134537	male	810	R4	AV	Zachvatkinia ovata	0
6134537	male	810	R5	PV	Microspalax brevipes	7
6134537	male	810	R5	PV	Zachvatkinia ovata	0
6134537	male	810	R5	AV	Microspalax brevipes	4
6134537	male	810	R5	AV	Zachvatkinia ovata	0
6134537	male	810	R6	PV	Microspalax brevipes	4
6134537	male	810	R6	PV	Zachvatkinia ovata	0
6134537	male	810	R6	AV	Microspalax brevipes	1
6134537	male	810	R6	AV	Zachvatkinia ovata	0
6198158	female	680	P1	DPV	Microspalax brevipes	35
6198158	female	680	P1	DPV	Zachvatkinia ovata	0
6198158	female	680	P1	PPV	Microspalax brevipes	0
6198158	female	680	P1	PPV	Zachvatkinia ovata	0
6198158	female	680	P1	DAV	Microspalax brevipes	20
6198158	female	680	P1	DAV	Zachvatkinia ovata	0
6198158	female	680	P1	PAV	Microspalax brevipes	0
6198158	female	680	P1	PAV	Zachvatkinia ovata	0
6198158	female	680	P2	DPV	Microspalax brevipes	70
6198158	female	680	P2	DPV	Zachvatkinia ovata	0
6198158	female	680	P2	PPV	Microspalax brevipes	0
6198158	female	680	P2	PPV	Zachvatkinia ovata	0
6198158	female	680	P2	DAV	Microspalax brevipes	20
6198158	female	680	P2	DAV	Zachvatkinia ovata	0
6198158	female	680	P2	PAV	Microspalax brevipes	0
6198158	female	680	P2	PAV	Zachvatkinia ovata	0
6198158	female	680	P3	DPV	Microspalax brevipes	999
6198158	female	680	P3	DPV	Zachvatkinia ovata	0
6198158	female	680	P3	PPV	Microspalax brevipes	0
6198158	female	680	P3	PPV	Zachvatkinia ovata	0
6198158	female	680	P3	DAV	Microspalax brevipes	35
6198158	female	680	P3	DAV	Zachvatkinia ovata	0
6198158	female	680	P3	PAV	Microspalax brevipes	0
6198158	female	680	P3	PAV	Zachvatkinia ovata	0
6198158	female	680	P4	DPV	Microspalax brevipes	999
6198158	female	680	P4	DPV	Zachvatkinia ovata	0
6198158	female	680	P4	PPV	Microspalax brevipes	0
6198158	female	680	P4	PPV	Zachvatkinia ovata	0
6198158	female	680	P4	DAV	Microspalax brevipes	35
6198158	female	680	P4	DAV	Zachvatkinia ovata	0
6198158	female	680	P4	PAV	Microspalax brevipes	0
6198158	female	680	P4	PAV	Zachvatkinia ovata	0
6198158	female	680	P5	DPV	Microspalax brevipes	999
6198158	female	680	P5	DPV	Zachvatkinia ovata	0
6198158	female	680	P5	PPV	Microspalax brevipes	4
6198158	female	680	P5	PPV	Zachvatkinia ovata	0
6198158	female	680	P5	DAV	Microspalax brevipes	35
6198158	female	680	P5	DAV	Zachvatkinia ovata	1
6198158	female	680	P5	PAV	Microspalax brevipes	4
6198158	female	680	P5	PAV	Zachvatkinia ovata	1
6198158	female	680	P6	DPV	Microspalax brevipes	999
6198158	female	680	P6	DPV	Zachvatkinia ovata	8
6198158	female	680	P6	PPV	Microspalax brevipes	15
6198158	female	680	P6	PPV	Zachvatkinia ovata	4
6198158	female	680	P6	DAV	Microspalax brevipes	2
6198158	female	680	P6	DAV	Zachvatkinia ovata	8
6198158	female	680	P6	PAV	Microspalax brevipes	0
6198158	female	680	P6	PAV	Zachvatkinia ovata	5
6198158	female	680	P7	DPV	Microspalax brevipes	90
6198158	female	680	P7	DPV	Zachvatkinia ovata	10
6198158	female	680	P7	PPV	Microspalax brevipes	1
6198158	female	680	P7	PPV	Zachvatkinia ovata	0
6198158	female	680	P7	DAV	Microspalax brevipes	1
6198158	female	680	P7	DAV	Zachvatkinia ovata	8
6198158	female	680	P7	PAV	Microspalax brevipes	0
6198158	female	680	P7	PAV	Zachvatkinia ovata	2
6198158	female	680	P8	DPV	Microspalax brevipes	35
6198158	female	680	P8	DPV	Zachvatkinia ovata	4
6198158	female	680	P8	PPV	Microspalax brevipes	3
6198158	female	680	P8	PPV	Zachvatkinia ovata	1
6198158	female	680	P8	DAV	Microspalax brevipes	0
6198158	female	680	P8	DAV	Zachvatkinia ovata	15
6198158	female	680	P8	PAV	Microspalax brevipes	0
6198158	female	680	P8	PAV	Zachvatkinia ovata	15
6198158	female	680	P9	DPV	Microspalax brevipes	2
6198158	female	680	P9	DPV	Zachvatkinia ovata	15
6198158	female	680	P9	PPV	Microspalax brevipes	0
6198158	female	680	P9	PPV	Zachvatkinia ovata	8
6198158	female	680	P9	DAV	Microspalax brevipes	0
6198158	female	680	P9	DAV	Zachvatkinia ovata	25
6198158	female	680	P9	PAV	Microspalax brevipes	0
6198158	female	680	P9	PAV	Zachvatkinia ovata	55
6198158	female	680	P10	DPV	Microspalax brevipes	0
6198158	female	680	P10	DPV	Zachvatkinia ovata	999
6198158	female	680	P10	PPV	Microspalax brevipes	0
6198158	female	680	P10	PPV	Zachvatkinia ovata	999
6198158	female	680	R1	PV	Microspalax brevipes	0
6198158	female	680	R1	PV	Zachvatkinia ovata	0
6198158	female	680	R1	AV	Microspalax brevipes	0
6198158	female	680	R1	AV	Zachvatkinia ovata	0
6198158	female	680	R2	PV	Microspalax brevipes	0
6198158	female	680	R2	PV	Zachvatkinia ovata	0
6198158	female	680	R2	AV	Microspalax brevipes	0
6198158	female	680	R2	AV	Zachvatkinia ovata	0
6198158	female	680	R3	PV	Microspalax brevipes	1
6198158	female	680	R3	PV	Zachvatkinia ovata	0
6198158	female	680	R3	AV	Microspalax brevipes	0
6198158	female	680	R3	AV	Zachvatkinia ovata	0
6198158	female	680	R4	PV	Microspalax brevipes	1
6198158	female	680	R4	PV	Zachvatkinia ovata	0
6198158	female	680	R4	AV	Microspalax brevipes	4
6198158	female	680	R4	AV	Zachvatkinia ovata	0
6198158	female	680	R5	PV	Microspalax brevipes	1
6198158	female	680	R5	PV	Zachvatkinia ovata	0
6198158	female	680	R5	AV	Microspalax brevipes	0
6198158	female	680	R5	AV	Zachvatkinia ovata	0
6198158	female	680	R6	PV	Microspalax brevipes	1
6198158	female	680	R6	PV	Zachvatkinia ovata	0
6198158	female	680	R6	AV	Microspalax brevipes	0
6198158	female	680	R6	AV	Zachvatkinia ovata	0
6140495	female	650	P1	DPV	Microspalax brevipes	33
6140495	female	650	P1	DPV	Zachvatkinia ovata	0
6140495	female	650	P1	PPV	Microspalax brevipes	3
6140495	female	650	P1	PPV	Zachvatkinia ovata	0
6140495	female	650	P1	DAV	Microspalax brevipes	4
6140495	female	650	P1	DAV	Zachvatkinia ovata	0
6140495	female	650	P1	PAV	Microspalax brevipes	0
6140495	female	650	P1	PAV	Zachvatkinia ovata	0
6140495	female	650	P2	DPV	Microspalax brevipes	25
6140495	female	650	P2	DPV	Zachvatkinia ovata	0
6140495	female	650	P2	PPV	Microspalax brevipes	0
6140495	female	650	P2	PPV	Zachvatkinia ovata	0
6140495	female	650	P2	DAV	Microspalax brevipes	7
6140495	female	650	P2	DAV	Zachvatkinia ovata	0
6140495	female	650	P2	PAV	Microspalax brevipes	0
6140495	female	650	P2	PAV	Zachvatkinia ovata	0
6140495	female	650	P3	DPV	Microspalax brevipes	90
6140495	female	650	P3	DPV	Zachvatkinia ovata	0
6140495	female	650	P3	PPV	Microspalax brevipes	4
6140495	female	650	P3	PPV	Zachvatkinia ovata	0
6140495	female	650	P3	DAV	Microspalax brevipes	7
6140495	female	650	P3	DAV	Zachvatkinia ovata	0
6140495	female	650	P3	PAV	Microspalax brevipes	3
6140495	female	650	P3	PAV	Zachvatkinia ovata	0
6140495	female	650	P4	DPV	Microspalax brevipes	999
6140495	female	650	P4	DPV	Zachvatkinia ovata	0
6140495	female	650	P4	PPV	Microspalax brevipes	27
6140495	female	650	P4	PPV	Zachvatkinia ovata	0
6140495	female	650	P4	DAV	Microspalax brevipes	35
6140495	female	650	P4	DAV	Zachvatkinia ovata	0
6140495	female	650	P4	PAV	Microspalax brevipes	7
6140495	female	650	P4	PAV	Zachvatkinia ovata	0
6140495	female	650	P5	DPV	Microspalax brevipes	999
6140495	female	650	P5	DPV	Zachvatkinia ovata	0
6140495	female	650	P5	PPV	Microspalax brevipes	999
6140495	female	650	P5	PPV	Zachvatkinia ovata	0
6140495	female	650	P5	DAV	Microspalax brevipes	26
6140495	female	650	P5	DAV	Zachvatkinia ovata	0
6140495	female	650	P5	PAV	Microspalax brevipes	5
6140495	female	650	P5	PAV	Zachvatkinia ovata	0
6140495	female	650	P6	DPV	Microspalax brevipes	999
6140495	female	650	P6	DPV	Zachvatkinia ovata	3
6140495	female	650	P6	PPV	Microspalax brevipes	999
6140495	female	650	P6	PPV	Zachvatkinia ovata	0
6140495	female	650	P6	DAV	Microspalax brevipes	5
6140495	female	650	P6	DAV	Zachvatkinia ovata	0
6140495	female	650	P6	PAV	Microspalax brevipes	1
6140495	female	650	P6	PAV	Zachvatkinia ovata	0
6140495	female	650	P7	DPV	Microspalax brevipes	999
6140495	female	650	P7	DPV	Zachvatkinia ovata	2
6140495	female	650	P7	PPV	Microspalax brevipes	999
6140495	female	650	P7	PPV	Zachvatkinia ovata	0
6140495	female	650	P7	DAV	Microspalax brevipes	0
6140495	female	650	P7	DAV	Zachvatkinia ovata	1
6140495	female	650	P7	PAV	Microspalax brevipes	0
6140495	female	650	P7	PAV	Zachvatkinia ovata	0
6140495	female	650	P8	DPV	Microspalax brevipes	999
6140495	female	650	P8	DPV	Zachvatkinia ovata	1
6140495	female	650	P8	PPV	Microspalax brevipes	55
6140495	female	650	P8	PPV	Zachvatkinia ovata	1
6140495	female	650	P8	DAV	Microspalax brevipes	0
6140495	female	650	P8	DAV	Zachvatkinia ovata	8
6140495	female	650	P8	PAV	Microspalax brevipes	0
6140495	female	650	P8	PAV	Zachvatkinia ovata	0
6140495	female	650	P9	DPV	Microspalax brevipes	999
6140495	female	650	P9	DPV	Zachvatkinia ovata	8
6140495	female	650	P9	PPV	Microspalax brevipes	8
6140495	female	650	P9	PPV	Zachvatkinia ovata	0
6140495	female	650	P9	DAV	Microspalax brevipes	0
6140495	female	650	P9	DAV	Zachvatkinia ovata	15
6140495	female	650	P9	PAV	Microspalax brevipes	0
6140495	female	650	P9	PAV	Zachvatkinia ovata	0
6140495	female	650	P10	DPV	Microspalax brevipes	0
6140495	female	650	P10	DPV	Zachvatkinia ovata	50
6140495	female	650	P10	PPV	Microspalax brevipes	0
6140495	female	650	P10	PPV	Zachvatkinia ovata	30
6140495	female	650	R1	PV	Microspalax brevipes	2
6140495	female	650	R1	PV	Zachvatkinia ovata	0
6140495	female	650	R1	AV	Microspalax brevipes	2
6140495	female	650	R1	AV	Zachvatkinia ovata	0
6140495	female	650	R2	PV	Microspalax brevipes	0
6140495	female	650	R2	PV	Zachvatkinia ovata	0
6140495	female	650	R2	AV	Microspalax brevipes	5
6140495	female	650	R2	AV	Zachvatkinia ovata	0
6140495	female	650	R3	PV	Microspalax brevipes	0
6140495	female	650	R3	PV	Zachvatkinia ovata	0
6140495	female	650	R3	AV	Microspalax brevipes	3
6140495	female	650	R3	AV	Zachvatkinia ovata	0
6140495	female	650	R4	PV	Microspalax brevipes	0
6140495	female	650	R4	PV	Zachvatkinia ovata	0
6140495	female	650	R4	AV	Microspalax brevipes	6
6140495	female	650	R4	AV	Zachvatkinia ovata	0
6140495	female	650	R5	PV	Microspalax brevipes	4
6140495	female	650	R5	PV	Zachvatkinia ovata	0
6140495	female	650	R5	AV	Microspalax brevipes	11
6140495	female	650	R5	AV	Zachvatkinia ovata	0
6140495	female	650	R6	PV	Microspalax brevipes	0
6140495	female	650	R6	PV	Zachvatkinia ovata	0
6140495	female	650	R6	AV	Microspalax brevipes	4
6140495	female	650	R6	AV	Zachvatkinia ovata	0
6143074	female	680	P1	DPV	Microspalax brevipes	36
6143074	female	680	P1	DPV	Zachvatkinia ovata	0
6143074	female	680	P1	PPV	Microspalax brevipes	0
6143074	female	680	P1	PPV	Zachvatkinia ovata	0
6143074	female	680	P1	DAV	Microspalax brevipes	36
6143074	female	680	P1	DAV	Zachvatkinia ovata	0
6143074	female	680	P1	PAV	Microspalax brevipes	0
6143074	female	680	P1	PAV	Zachvatkinia ovata	0
6143074	female	680	P2	DPV	Microspalax brevipes	52
6143074	female	680	P2	DPV	Zachvatkinia ovata	0
6143074	female	680	P2	PPV	Microspalax brevipes	0
6143074	female	680	P2	PPV	Zachvatkinia ovata	0
6143074	female	680	P2	DAV	Microspalax brevipes	53
6143074	female	680	P2	DAV	Zachvatkinia ovata	0
6143074	female	680	P2	PAV	Microspalax brevipes	0
6143074	female	680	P2	PAV	Zachvatkinia ovata	0
6143074	female	680	P3	DPV	Microspalax brevipes	100
6143074	female	680	P3	DPV	Zachvatkinia ovata	0
6143074	female	680	P3	PPV	Microspalax brevipes	0
6143074	female	680	P3	PPV	Zachvatkinia ovata	0
6143074	female	680	P3	DAV	Microspalax brevipes	85
6143074	female	680	P3	DAV	Zachvatkinia ovata	0
6143074	female	680	P3	PAV	Microspalax brevipes	1
6143074	female	680	P3	PAV	Zachvatkinia ovata	0
6143074	female	680	P4	DPV	Microspalax brevipes	999
6143074	female	680	P4	DPV	Zachvatkinia ovata	0
6143074	female	680	P4	PPV	Microspalax brevipes	1
6143074	female	680	P4	PPV	Zachvatkinia ovata	0
6143074	female	680	P4	DAV	Microspalax brevipes	85
6143074	female	680	P4	DAV	Zachvatkinia ovata	0
6143074	female	680	P4	PAV	Microspalax brevipes	5
6143074	female	680	P4	PAV	Zachvatkinia ovata	0
6143074	female	680	P5	DPV	Microspalax brevipes	999
6143074	female	680	P5	DPV	Zachvatkinia ovata	0
6143074	female	680	P5	PPV	Microspalax brevipes	1
6143074	female	680	P5	PPV	Zachvatkinia ovata	0
6143074	female	680	P5	DAV	Microspalax brevipes	12
6143074	female	680	P5	DAV	Zachvatkinia ovata	0
6143074	female	680	P5	PAV	Microspalax brevipes	1
6143074	female	680	P5	PAV	Zachvatkinia ovata	0
6143074	female	680	P6	DPV	Microspalax brevipes	75
6143074	female	680	P6	DPV	Zachvatkinia ovata	0
6143074	female	680	P6	PPV	Microspalax brevipes	0
6143074	female	680	P6	PPV	Zachvatkinia ovata	0
6143074	female	680	P6	DAV	Microspalax brevipes	1
6143074	female	680	P6	DAV	Zachvatkinia ovata	0
6143074	female	680	P6	PAV	Microspalax brevipes	0
6143074	female	680	P6	PAV	Zachvatkinia ovata	0
6143074	female	680	P7	DPV	Microspalax brevipes	47
6143074	female	680	P7	DPV	Zachvatkinia ovata	8
6143074	female	680	P7	PPV	Microspalax brevipes	0
6143074	female	680	P7	PPV	Zachvatkinia ovata	0
6143074	female	680	P7	DAV	Microspalax brevipes	0
6143074	female	680	P7	DAV	Zachvatkinia ovata	2
6143074	female	680	P7	PAV	Microspalax brevipes	0
6143074	female	680	P7	PAV	Zachvatkinia ovata	0
6143074	female	680	P8	DPV	Microspalax brevipes	31
6143074	female	680	P8	DPV	Zachvatkinia ovata	20
6143074	female	680	P8	PPV	Microspalax brevipes	1
6143074	female	680	P8	PPV	Zachvatkinia ovata	1
6143074	female	680	P8	DAV	Microspalax brevipes	0
6143074	female	680	P8	DAV	Zachvatkinia ovata	8
6143074	female	680	P8	PAV	Microspalax brevipes	0
6143074	female	680	P8	PAV	Zachvatkinia ovata	0
6143074	female	680	P9	DPV	Microspalax brevipes	6
6143074	female	680	P9	DPV	Zachvatkinia ovata	15
6143074	female	680	P9	PPV	Microspalax brevipes	2
6143074	female	680	P9	PPV	Zachvatkinia ovata	15
6143074	female	680	P9	DAV	Microspalax brevipes	0
6143074	female	680	P9	DAV	Zachvatkinia ovata	15
6143074	female	680	P9	PAV	Microspalax brevipes	0
6143074	female	680	P9	PAV	Zachvatkinia ovata	8
6143074	female	680	P10	DPV	Microspalax brevipes	0
6143074	female	680	P10	DPV	Zachvatkinia ovata	999
6143074	female	680	P10	PPV	Microspalax brevipes	0
6143074	female	680	P10	PPV	Zachvatkinia ovata	999
6143074	female	680	R1	PV	Microspalax brevipes	4
6143074	female	680	R1	PV	Zachvatkinia ovata	0
6143074	female	680	R1	AV	Microspalax brevipes	0
6143074	female	680	R1	AV	Zachvatkinia ovata	0
6143074	female	680	R2	PV	Microspalax brevipes	0
6143074	female	680	R2	PV	Zachvatkinia ovata	0
6143074	female	680	R2	AV	Microspalax brevipes	0
6143074	female	680	R2	AV	Zachvatkinia ovata	0
6143074	female	680	R3	PV	Microspalax brevipes	1
6143074	female	680	R3	PV	Zachvatkinia ovata	0
6143074	female	680	R3	AV	Microspalax brevipes	0
6143074	female	680	R3	AV	Zachvatkinia ovata	0
6143074	female	680	R4	PV	Microspalax brevipes	1
6143074	female	680	R4	PV	Zachvatkinia ovata	0
6143074	female	680	R4	AV	Microspalax brevipes	2
6143074	female	680	R4	AV	Zachvatkinia ovata	0
6143074	female	680	R5	PV	Microspalax brevipes	1
6143074	female	680	R5	PV	Zachvatkinia ovata	0
6143074	female	680	R5	AV	Microspalax brevipes	0
6143074	female	680	R5	AV	Zachvatkinia ovata	0
6143074	female	680	R6	PV	Microspalax brevipes	1
6143074	female	680	R6	PV	Zachvatkinia ovata	0
6143074	female	680	R6	AV	Microspalax brevipes	0
6143074	female	680	R6	AV	Zachvatkinia ovata	0
6198152	female	620	P1	DPV	Microspalax brevipes	0
6198152	female	620	P1	DPV	Zachvatkinia ovata	0
6198152	female	620	P1	PPV	Microspalax brevipes	0
6198152	female	620	P1	PPV	Zachvatkinia ovata	0
6198152	female	620	P1	DAV	Microspalax brevipes	0
6198152	female	620	P1	DAV	Zachvatkinia ovata	0
6198152	female	620	P1	PAV	Microspalax brevipes	0
6198152	female	620	P1	PAV	Zachvatkinia ovata	0
6198152	female	620	P2	DPV	Microspalax brevipes	0
6198152	female	620	P2	DPV	Zachvatkinia ovata	0
6198152	female	620	P2	PPV	Microspalax brevipes	0
6198152	female	620	P2	PPV	Zachvatkinia ovata	0
6198152	female	620	P2	DAV	Microspalax brevipes	0
6198152	female	620	P2	DAV	Zachvatkinia ovata	0
6198152	female	620	P2	PAV	Microspalax brevipes	0
6198152	female	620	P2	PAV	Zachvatkinia ovata	0
6198152	female	620	P3	DPV	Microspalax brevipes	3
6198152	female	620	P3	DPV	Zachvatkinia ovata	0
6198152	female	620	P3	PPV	Microspalax brevipes	0
6198152	female	620	P3	PPV	Zachvatkinia ovata	0
6198152	female	620	P3	DAV	Microspalax brevipes	0
6198152	female	620	P3	DAV	Zachvatkinia ovata	0
6198152	female	620	P3	PAV	Microspalax brevipes	0
6198152	female	620	P3	PAV	Zachvatkinia ovata	0
6198152	female	620	P4	DPV	Microspalax brevipes	35
6198152	female	620	P4	DPV	Zachvatkinia ovata	0
6198152	female	620	P4	PPV	Microspalax brevipes	0
6198152	female	620	P4	PPV	Zachvatkinia ovata	0
6198152	female	620	P4	DAV	Microspalax brevipes	0
6198152	female	620	P4	DAV	Zachvatkinia ovata	0
6198152	female	620	P4	PAV	Microspalax brevipes	0
6198152	female	620	P4	PAV	Zachvatkinia ovata	0
6198152	female	620	P5	DPV	Microspalax brevipes	90
6198152	female	620	P5	DPV	Zachvatkinia ovata	0
6198152	female	620	P5	PPV	Microspalax brevipes	0
6198152	female	620	P5	PPV	Zachvatkinia ovata	0
6198152	female	620	P5	DAV	Microspalax brevipes	30
6198152	female	620	P5	DAV	Zachvatkinia ovata	0
6198152	female	620	P5	PAV	Microspalax brevipes	0
6198152	female	620	P5	PAV	Zachvatkinia ovata	0
6198152	female	620	P6	DPV	Microspalax brevipes	999
6198152	female	620	P6	DPV	Zachvatkinia ovata	0
6198152	female	620	P6	PPV	Microspalax brevipes	0
6198152	female	620	P6	PPV	Zachvatkinia ovata	0
6198152	female	620	P6	DAV	Microspalax brevipes	26
6198152	female	620	P6	DAV	Zachvatkinia ovata	0
6198152	female	620	P6	PAV	Microspalax brevipes	0
6198152	female	620	P6	PAV	Zachvatkinia ovata	0
6198152	female	620	P7	DPV	Microspalax brevipes	999
6198152	female	620	P7	DPV	Zachvatkinia ovata	8
6198152	female	620	P7	PPV	Microspalax brevipes	3
6198152	female	620	P7	PPV	Zachvatkinia ovata	0
6198152	female	620	P7	DAV	Microspalax brevipes	3
6198152	female	620	P7	DAV	Zachvatkinia ovata	0
6198152	female	620	P7	PAV	Microspalax brevipes	0
6198152	female	620	P7	PAV	Zachvatkinia ovata	0
6198152	female	620	P8	DPV	Microspalax brevipes	999
6198152	female	620	P8	DPV	Zachvatkinia ovata	8
6198152	female	620	P8	PPV	Microspalax brevipes	2
6198152	female	620	P8	PPV	Zachvatkinia ovata	0
6198152	female	620	P8	DAV	Microspalax brevipes	0
6198152	female	620	P8	DAV	Zachvatkinia ovata	8
6198152	female	620	P8	PAV	Microspalax brevipes	0
6198152	female	620	P8	PAV	Zachvatkinia ovata	0
6198152	female	620	P9	DPV	Microspalax brevipes	999
6198152	female	620	P9	DPV	Zachvatkinia ovata	15
6198152	female	620	P9	PPV	Microspalax brevipes	0
6198152	female	620	P9	PPV	Zachvatkinia ovata	0
6198152	female	620	P9	DAV	Microspalax brevipes	0
6198152	female	620	P9	DAV	Zachvatkinia ovata	15
6198152	female	620	P9	PAV	Microspalax brevipes	0
6198152	female	620	P9	PAV	Zachvatkinia ovata	0
6198152	female	620	P10	DPV	Microspalax brevipes	11
6198152	female	620	P10	DPV	Zachvatkinia ovata	999
6198152	female	620	P10	PPV	Microspalax brevipes	0
6198152	female	620	P10	PPV	Zachvatkinia ovata	25
6198152	female	620	R1	PV	Microspalax brevipes	8
6198152	female	620	R1	PV	Zachvatkinia ovata	0
6198152	female	620	R1	AV	Microspalax brevipes	6
6198152	female	620	R1	AV	Zachvatkinia ovata	0
6198152	female	620	R2	PV	Microspalax brevipes	11
6198152	female	620	R2	PV	Zachvatkinia ovata	0
6198152	female	620	R2	AV	Microspalax brevipes	20
6198152	female	620	R2	AV	Zachvatkinia ovata	0
6198152	female	620	R3	PV	Microspalax brevipes	2
6198152	female	620	R3	PV	Zachvatkinia ovata	0
6198152	female	620	R3	AV	Microspalax brevipes	20
6198152	female	620	R3	AV	Zachvatkinia ovata	0
6198152	female	620	R4	PV	Microspalax brevipes	4
6198152	female	620	R4	PV	Zachvatkinia ovata	0
6198152	female	620	R4	AV	Microspalax brevipes	40
6198152	female	620	R4	AV	Zachvatkinia ovata	0
6198152	female	620	R5	PV	Microspalax brevipes	4
6198152	female	620	R5	PV	Zachvatkinia ovata	0
6198152	female	620	R5	AV	Microspalax brevipes	33
6198152	female	620	R5	AV	Zachvatkinia ovata	0
6198152	female	620	R6	PV	Microspalax brevipes	8
6198152	female	620	R6	PV	Zachvatkinia ovata	0
6198152	female	620	R6	AV	Microspalax brevipes	30
6198152	female	620	R6	AV	Zachvatkinia ovata	0
6106944	female	660	P1	DPV	Microspalax brevipes	60
6106944	female	660	P1	DPV	Zachvatkinia ovata	0
6106944	female	660	P1	PPV	Microspalax brevipes	7
6106944	female	660	P1	PPV	Zachvatkinia ovata	0
6106944	female	660	P1	DAV	Microspalax brevipes	18
6106944	female	660	P1	DAV	Zachvatkinia ovata	0
6106944	female	660	P1	PAV	Microspalax brevipes	5
6106944	female	660	P1	PAV	Zachvatkinia ovata	0
6106944	female	660	P2	DPV	Microspalax brevipes	60
6106944	female	660	P2	DPV	Zachvatkinia ovata	0
6106944	female	660	P2	PPV	Microspalax brevipes	7
6106944	female	660	P2	PPV	Zachvatkinia ovata	0
6106944	female	660	P2	DAV	Microspalax brevipes	20
6106944	female	660	P2	DAV	Zachvatkinia ovata	0
6106944	female	660	P2	PAV	Microspalax brevipes	5
6106944	female	660	P2	PAV	Zachvatkinia ovata	0
6106944	female	660	P3	DPV	Microspalax brevipes	38
6106944	female	660	P3	DPV	Zachvatkinia ovata	0
6106944	female	660	P3	PPV	Microspalax brevipes	3
6106944	female	660	P3	PPV	Zachvatkinia ovata	0
6106944	female	660	P3	DAV	Microspalax brevipes	15
6106944	female	660	P3	DAV	Zachvatkinia ovata	0
6106944	female	660	P3	PAV	Microspalax brevipes	8
6106944	female	660	P3	PAV	Zachvatkinia ovata	0
6106944	female	660	P4	DPV	Microspalax brevipes	57
6106944	female	660	P4	DPV	Zachvatkinia ovata	0
6106944	female	660	P4	PPV	Microspalax brevipes	15
6106944	female	660	P4	PPV	Zachvatkinia ovata	1
6106944	female	660	P4	DAV	Microspalax brevipes	19
6106944	female	660	P4	DAV	Zachvatkinia ovata	0
6106944	female	660	P4	PAV	Microspalax brevipes	12
6106944	female	660	P4	PAV	Zachvatkinia ovata	0
6106944	female	660	P5	DPV	Microspalax brevipes	51
6106944	female	660	P5	DPV	Zachvatkinia ovata	0
6106944	female	660	P5	PPV	Microspalax brevipes	17
6106944	female	660	P5	PPV	Zachvatkinia ovata	0
6106944	female	660	P5	DAV	Microspalax brevipes	7
6106944	female	660	P5	DAV	Zachvatkinia ovata	1
6106944	female	660	P5	PAV	Microspalax brevipes	10
6106944	female	660	P5	PAV	Zachvatkinia ovata	1
6106944	female	660	P6	DPV	Microspalax brevipes	40
6106944	female	660	P6	DPV	Zachvatkinia ovata	0
6106944	female	660	P6	PPV	Microspalax brevipes	13
6106944	female	660	P6	PPV	Zachvatkinia ovata	0
6106944	female	660	P6	DAV	Microspalax brevipes	0
6106944	female	660	P6	DAV	Zachvatkinia ovata	1
6106944	female	660	P6	PAV	Microspalax brevipes	3
6106944	female	660	P6	PAV	Zachvatkinia ovata	1
6106944	female	660	P7	DPV	Microspalax brevipes	20
6106944	female	660	P7	DPV	Zachvatkinia ovata	0
6106944	female	660	P7	PPV	Microspalax brevipes	7
6106944	female	660	P7	PPV	Zachvatkinia ovata	0
6106944	female	660	P7	DAV	Microspalax brevipes	0
6106944	female	660	P7	DAV	Zachvatkinia ovata	0
6106944	female	660	P7	PAV	Microspalax brevipes	0
6106944	female	660	P7	PAV	Zachvatkinia ovata	0
6106944	female	660	P8	DPV	Microspalax brevipes	3
6106944	female	660	P8	DPV	Zachvatkinia ovata	0
6106944	female	660	P8	PPV	Microspalax brevipes	2
6106944	female	660	P8	PPV	Zachvatkinia ovata	3
6106944	female	660	P8	DAV	Microspalax brevipes	0
6106944	female	660	P8	DAV	Zachvatkinia ovata	0
6106944	female	660	P8	PAV	Microspalax brevipes	0
6106944	female	660	P8	PAV	Zachvatkinia ovata	3
6106944	female	660	P9	DPV	Microspalax brevipes	0
6106944	female	660	P9	DPV	Zachvatkinia ovata	8
6106944	female	660	P9	PPV	Microspalax brevipes	0
6106944	female	660	P9	PPV	Zachvatkinia ovata	8
6106944	female	660	P9	DAV	Microspalax brevipes	0
6106944	female	660	P9	DAV	Zachvatkinia ovata	25
6106944	female	660	P9	PAV	Microspalax brevipes	0
6106944	female	660	P9	PAV	Zachvatkinia ovata	13
6106944	female	660	P10	DPV	Microspalax brevipes	0
6106944	female	660	P10	DPV	Zachvatkinia ovata	35
6106944	female	660	P10	PPV	Microspalax brevipes	0
6106944	female	660	P10	PPV	Zachvatkinia ovata	999
6106944	female	660	R1	PV	Microspalax brevipes	0
6106944	female	660	R1	PV	Zachvatkinia ovata	0
6106944	female	660	R1	AV	Microspalax brevipes	0
6106944	female	660	R1	AV	Zachvatkinia ovata	0
6106944	female	660	R2	PV	Microspalax brevipes	0
6106944	female	660	R2	PV	Zachvatkinia ovata	0
6106944	female	660	R2	AV	Microspalax brevipes	0
6106944	female	660	R2	AV	Zachvatkinia ovata	0
6106944	female	660	R3	PV	Microspalax brevipes	0
6106944	female	660	R3	PV	Zachvatkinia ovata	0
6106944	female	660	R3	AV	Microspalax brevipes	0
6106944	female	660	R3	AV	Zachvatkinia ovata	0
6106944	female	660	R4	PV	Microspalax brevipes	0
6106944	female	660	R4	PV	Zachvatkinia ovata	0
6106944	female	660	R4	AV	Microspalax brevipes	0
6106944	female	660	R4	AV	Zachvatkinia ovata	0
6106944	female	660	R5	PV	Microspalax brevipes	0
6106944	female	660	R5	PV	Zachvatkinia ovata	0
6106944	female	660	R5	AV	Microspalax brevipes	0
6106944	female	660	R5	AV	Zachvatkinia ovata	0
6106944	female	660	R6	PV	Microspalax brevipes	0
6106944	female	660	R6	PV	Zachvatkinia ovata	0
6106944	female	660	R6	AV	Microspalax brevipes	0
6106944	female	660	R6	AV	Zachvatkinia ovata	0
6175795	female	700	P1	DPV	Microspalax brevipes	22
6175795	female	700	P1	DPV	Zachvatkinia ovata	0
6175795	female	700	P1	PPV	Microspalax brevipes	0
6175795	female	700	P1	PPV	Zachvatkinia ovata	0
6175795	female	700	P1	DAV	Microspalax brevipes	15
6175795	female	700	P1	DAV	Zachvatkinia ovata	0
6175795	female	700	P1	PAV	Microspalax brevipes	0
6175795	female	700	P1	PAV	Zachvatkinia ovata	0
6175795	female	700	P2	DPV	Microspalax brevipes	75
6175795	female	700	P2	DPV	Zachvatkinia ovata	0
6175795	female	700	P2	PPV	Microspalax brevipes	0
6175795	female	700	P2	PPV	Zachvatkinia ovata	0
6175795	female	700	P2	DAV	Microspalax brevipes	20
6175795	female	700	P2	DAV	Zachvatkinia ovata	0
6175795	female	700	P2	PAV	Microspalax brevipes	0
6175795	female	700	P2	PAV	Zachvatkinia ovata	0
6175795	female	700	P3	DPV	Microspalax brevipes	95
6175795	female	700	P3	DPV	Zachvatkinia ovata	0
6175795	female	700	P3	PPV	Microspalax brevipes	6
6175795	female	700	P3	PPV	Zachvatkinia ovata	0
6175795	female	700	P3	DAV	Microspalax brevipes	18
6175795	female	700	P3	DAV	Zachvatkinia ovata	0
6175795	female	700	P3	PAV	Microspalax brevipes	2
6175795	female	700	P3	PAV	Zachvatkinia ovata	0
6175795	female	700	P4	DPV	Microspalax brevipes	999
6175795	female	700	P4	DPV	Zachvatkinia ovata	0
6175795	female	700	P4	PPV	Microspalax brevipes	10
6175795	female	700	P4	PPV	Zachvatkinia ovata	0
6175795	female	700	P4	DAV	Microspalax brevipes	11
6175795	female	700	P4	DAV	Zachvatkinia ovata	0
6175795	female	700	P4	PAV	Microspalax brevipes	2
6175795	female	700	P4	PAV	Zachvatkinia ovata	0
6175795	female	700	P5	DPV	Microspalax brevipes	999
6175795	female	700	P5	DPV	Zachvatkinia ovata	0
6175795	female	700	P5	PPV	Microspalax brevipes	10
6175795	female	700	P5	PPV	Zachvatkinia ovata	1
6175795	female	700	P5	DAV	Microspalax brevipes	8
6175795	female	700	P5	DAV	Zachvatkinia ovata	0
6175795	female	700	P5	PAV	Microspalax brevipes	0
6175795	female	700	P5	PAV	Zachvatkinia ovata	0
6175795	female	700	P6	DPV	Microspalax brevipes	999
6175795	female	700	P6	DPV	Zachvatkinia ovata	0
6175795	female	700	P6	PPV	Microspalax brevipes	5
6175795	female	700	P6	PPV	Zachvatkinia ovata	1
6175795	female	700	P6	DAV	Microspalax brevipes	1
6175795	female	700	P6	DAV	Zachvatkinia ovata	1
6175795	female	700	P6	PAV	Microspalax brevipes	0
6175795	female	700	P6	PAV	Zachvatkinia ovata	0
6175795	female	700	P7	DPV	Microspalax brevipes	999
6175795	female	700	P7	DPV	Zachvatkinia ovata	0
6175795	female	700	P7	PPV	Microspalax brevipes	23
6175795	female	700	P7	PPV	Zachvatkinia ovata	0
6175795	female	700	P7	DAV	Microspalax brevipes	0
6175795	female	700	P7	DAV	Zachvatkinia ovata	0
6175795	female	700	P7	PAV	Microspalax brevipes	0
6175795	female	700	P7	PAV	Zachvatkinia ovata	0
6175795	female	700	P8	DPV	Microspalax brevipes	999
6175795	female	700	P8	DPV	Zachvatkinia ovata	10
6175795	female	700	P8	PPV	Microspalax brevipes	12
6175795	female	700	P8	PPV	Zachvatkinia ovata	0
6175795	female	700	P8	DAV	Microspalax brevipes	1
6175795	female	700	P8	DAV	Zachvatkinia ovata	3
6175795	female	700	P8	PAV	Microspalax brevipes	0
6175795	female	700	P8	PAV	Zachvatkinia ovata	3
6175795	female	700	P9	DPV	Microspalax brevipes	999
6175795	female	700	P9	DPV	Zachvatkinia ovata	3
6175795	female	700	P9	PPV	Microspalax brevipes	5
6175795	female	700	P9	PPV	Zachvatkinia ovata	8
6175795	female	700	P9	DAV	Microspalax brevipes	0
6175795	female	700	P9	DAV	Zachvatkinia ovata	1
6175795	female	700	P9	PAV	Microspalax brevipes	0
6175795	female	700	P9	PAV	Zachvatkinia ovata	0
6175795	female	700	P10	DPV	Microspalax brevipes	0
6175795	female	700	P10	DPV	Zachvatkinia ovata	999
6175795	female	700	P10	PPV	Microspalax brevipes	0
6175795	female	700	P10	PPV	Zachvatkinia ovata	999
6175795	female	700	R1	PV	Microspalax brevipes	0
6175795	female	700	R1	PV	Zachvatkinia ovata	0
6175795	female	700	R1	AV	Microspalax brevipes	0
6175795	female	700	R1	AV	Zachvatkinia ovata	0
6175795	female	700	R2	PV	Microspalax brevipes	0
6175795	female	700	R2	PV	Zachvatkinia ovata	0
6175795	female	700	R2	AV	Microspalax brevipes	0
6175795	female	700	R2	AV	Zachvatkinia ovata	0
6175795	female	700	R3	PV	Microspalax brevipes	1
6175795	female	700	R3	PV	Zachvatkinia ovata	0
6175795	female	700	R3	AV	Microspalax brevipes	1
6175795	female	700	R3	AV	Zachvatkinia ovata	0
6175795	female	700	R4	PV	Microspalax brevipes	3
6175795	female	700	R4	PV	Zachvatkinia ovata	0
6175795	female	700	R4	AV	Microspalax brevipes	0
6175795	female	700	R4	AV	Zachvatkinia ovata	0
6175795	female	700	R5	PV	Microspalax brevipes	1
6175795	female	700	R5	PV	Zachvatkinia ovata	0
6175795	female	700	R5	AV	Microspalax brevipes	5
6175795	female	700	R5	AV	Zachvatkinia ovata	0
6175795	female	700	R6	PV	Microspalax brevipes	1
6175795	female	700	R6	PV	Zachvatkinia ovata	0
6175795	female	700	R6	AV	Microspalax brevipes	0
6175795	female	700	R6	AV	Zachvatkinia ovata	0
6175731	male	680	P1	DPV	Microspalax brevipes	8
6175731	male	680	P1	DPV	Zachvatkinia ovata	0
6175731	male	680	P1	PPV	Microspalax brevipes	0
6175731	male	680	P1	PPV	Zachvatkinia ovata	0
6175731	male	680	P1	DAV	Microspalax brevipes	3
6175731	male	680	P1	DAV	Zachvatkinia ovata	0
6175731	male	680	P1	PAV	Microspalax brevipes	0
6175731	male	680	P1	PAV	Zachvatkinia ovata	0
6175731	male	680	P2	DPV	Microspalax brevipes	22
6175731	male	680	P2	DPV	Zachvatkinia ovata	0
6175731	male	680	P2	PPV	Microspalax brevipes	0
6175731	male	680	P2	PPV	Zachvatkinia ovata	0
6175731	male	680	P2	DAV	Microspalax brevipes	1
6175731	male	680	P2	DAV	Zachvatkinia ovata	0
6175731	male	680	P2	PAV	Microspalax brevipes	0
6175731	male	680	P2	PAV	Zachvatkinia ovata	0
6175731	male	680	P3	DPV	Microspalax brevipes	75
6175731	male	680	P3	DPV	Zachvatkinia ovata	0
6175731	male	680	P3	PPV	Microspalax brevipes	3
6175731	male	680	P3	PPV	Zachvatkinia ovata	0
6175731	male	680	P3	DAV	Microspalax brevipes	10
6175731	male	680	P3	DAV	Zachvatkinia ovata	0
6175731	male	680	P3	PAV	Microspalax brevipes	1
6175731	male	680	P3	PAV	Zachvatkinia ovata	0
6175731	male	680	P4	DPV	Microspalax brevipes	999
6175731	male	680	P4	DPV	Zachvatkinia ovata	0
6175731	male	680	P4	PPV	Microspalax brevipes	6
6175731	male	680	P4	PPV	Zachvatkinia ovata	0
6175731	male	680	P4	DAV	Microspalax brevipes	17
6175731	male	680	P4	DAV	Zachvatkinia ovata	0
6175731	male	680	P4	PAV	Microspalax brevipes	2
6175731	male	680	P4	PAV	Zachvatkinia ovata	0
6175731	male	680	P5	DPV	Microspalax brevipes	999
6175731	male	680	P5	DPV	Zachvatkinia ovata	0
6175731	male	680	P5	PPV	Microspalax brevipes	20
6175731	male	680	P5	PPV	Zachvatkinia ovata	0
6175731	male	680	P5	DAV	Microspalax brevipes	7
6175731	male	680	P5	DAV	Zachvatkinia ovata	0
6175731	male	680	P5	PAV	Microspalax brevipes	1
6175731	male	680	P5	PAV	Zachvatkinia ovata	0
6175731	male	680	P6	DPV	Microspalax brevipes	999
6175731	male	680	P6	DPV	Zachvatkinia ovata	3
6175731	male	680	P6	PPV	Microspalax brevipes	23
6175731	male	680	P6	PPV	Zachvatkinia ovata	0
6175731	male	680	P6	DAV	Microspalax brevipes	1
6175731	male	680	P6	DAV	Zachvatkinia ovata	5
6175731	male	680	P6	PAV	Microspalax brevipes	1
6175731	male	680	P6	PAV	Zachvatkinia ovata	0
6175731	male	680	P7	DPV	Microspalax brevipes	50
6175731	male	680	P7	DPV	Zachvatkinia ovata	8
6175731	male	680	P7	PPV	Microspalax brevipes	0
6175731	male	680	P7	PPV	Zachvatkinia ovata	0
6175731	male	680	P7	DAV	Microspalax brevipes	0
6175731	male	680	P7	DAV	Zachvatkinia ovata	15
6175731	male	680	P7	PAV	Microspalax brevipes	0
6175731	male	680	P7	PAV	Zachvatkinia ovata	10
6175731	male	680	P8	DPV	Microspalax brevipes	6
6175731	male	680	P8	DPV	Zachvatkinia ovata	8
6175731	male	680	P8	PPV	Microspalax brevipes	0
6175731	male	680	P8	PPV	Zachvatkinia ovata	0
6175731	male	680	P8	DAV	Microspalax brevipes	0
6175731	male	680	P8	DAV	Zachvatkinia ovata	10
6175731	male	680	P8	PAV	Microspalax brevipes	0
6175731	male	680	P8	PAV	Zachvatkinia ovata	15
6175731	male	680	P9	DPV	Microspalax brevipes	0
6175731	male	680	P9	DPV	Zachvatkinia ovata	8
6175731	male	680	P9	PPV	Microspalax brevipes	0
6175731	male	680	P9	PPV	Zachvatkinia ovata	8
6175731	male	680	P9	DAV	Microspalax brevipes	0
6175731	male	680	P9	DAV	Zachvatkinia ovata	15
6175731	male	680	P9	PAV	Microspalax brevipes	0
6175731	male	680	P9	PAV	Zachvatkinia ovata	25
6175731	male	680	P10	DPV	Microspalax brevipes	0
6175731	male	680	P10	DPV	Zachvatkinia ovata	999
6175731	male	680	P10	PPV	Microspalax brevipes	0
6175731	male	680	P10	PPV	Zachvatkinia ovata	999
6175731	male	680	R1	PV	Microspalax brevipes	0
6175731	male	680	R1	PV	Zachvatkinia ovata	0
6175731	male	680	R1	AV	Microspalax brevipes	0
6175731	male	680	R1	AV	Zachvatkinia ovata	0
6175731	male	680	R2	PV	Microspalax brevipes	0
6175731	male	680	R2	PV	Zachvatkinia ovata	0
6175731	male	680	R2	AV	Microspalax brevipes	0
6175731	male	680	R2	AV	Zachvatkinia ovata	0
6175731	male	680	R3	PV	Microspalax brevipes	0
6175731	male	680	R3	PV	Zachvatkinia ovata	0
6175731	male	680	R3	AV	Microspalax brevipes	0
6175731	male	680	R3	AV	Zachvatkinia ovata	0
6175731	male	680	R4	PV	Microspalax brevipes	0
6175731	male	680	R4	PV	Zachvatkinia ovata	0
6175731	male	680	R4	AV	Microspalax brevipes	5
6175731	male	680	R4	AV	Zachvatkinia ovata	0
6175731	male	680	R5	PV	Microspalax brevipes	0
6175731	male	680	R5	PV	Zachvatkinia ovata	0
6175731	male	680	R5	AV	Microspalax brevipes	3
6175731	male	680	R5	AV	Zachvatkinia ovata	0
6175731	male	680	R6	PV	Microspalax brevipes	0
6175731	male	680	R6	PV	Zachvatkinia ovata	0
6175731	male	680	R6	AV	Microspalax brevipes	1
6175731	male	680	R6	AV	Zachvatkinia ovata	0
6198164	male	710	P1	DPV	Microspalax brevipes	60
6198164	male	710	P1	DPV	Zachvatkinia ovata	0
6198164	male	710	P1	PPV	Microspalax brevipes	40
6198164	male	710	P1	PPV	Zachvatkinia ovata	0
6198164	male	710	P1	DAV	Microspalax brevipes	30
6198164	male	710	P1	DAV	Zachvatkinia ovata	0
6198164	male	710	P1	PAV	Microspalax brevipes	11
6198164	male	710	P1	PAV	Zachvatkinia ovata	0
6198164	male	710	P2	DPV	Microspalax brevipes	999
6198164	male	710	P2	DPV	Zachvatkinia ovata	0
6198164	male	710	P2	PPV	Microspalax brevipes	21
6198164	male	710	P2	PPV	Zachvatkinia ovata	0
6198164	male	710	P2	DAV	Microspalax brevipes	50
6198164	male	710	P2	DAV	Zachvatkinia ovata	0
6198164	male	710	P2	PAV	Microspalax brevipes	18
6198164	male	710	P2	PAV	Zachvatkinia ovata	0
6198164	male	710	P3	DPV	Microspalax brevipes	999
6198164	male	710	P3	DPV	Zachvatkinia ovata	0
6198164	male	710	P3	PPV	Microspalax brevipes	30
6198164	male	710	P3	PPV	Zachvatkinia ovata	0
6198164	male	710	P3	DAV	Microspalax brevipes	33
6198164	male	710	P3	DAV	Zachvatkinia ovata	0
6198164	male	710	P3	PAV	Microspalax brevipes	25
6198164	male	710	P3	PAV	Zachvatkinia ovata	0
6198164	male	710	P4	DPV	Microspalax brevipes	999
6198164	male	710	P4	DPV	Zachvatkinia ovata	0
6198164	male	710	P4	PPV	Microspalax brevipes	70
6198164	male	710	P4	PPV	Zachvatkinia ovata	0
6198164	male	710	P4	DAV	Microspalax brevipes	50
6198164	male	710	P4	DAV	Zachvatkinia ovata	0
6198164	male	710	P4	PAV	Microspalax brevipes	46
6198164	male	710	P4	PAV	Zachvatkinia ovata	0
6198164	male	710	P5	DPV	Microspalax brevipes	999
6198164	male	710	P5	DPV	Zachvatkinia ovata	0
6198164	male	710	P5	PPV	Microspalax brevipes	999
6198164	male	710	P5	PPV	Zachvatkinia ovata	1
6198164	male	710	P5	DAV	Microspalax brevipes	20
6198164	male	710	P5	DAV	Zachvatkinia ovata	0
6198164	male	710	P5	PAV	Microspalax brevipes	40
6198164	male	710	P5	PAV	Zachvatkinia ovata	0
6198164	male	710	P6	DPV	Microspalax brevipes	999
6198164	male	710	P6	DPV	Zachvatkinia ovata	1
6198164	male	710	P6	PPV	Microspalax brevipes	60
6198164	male	710	P6	PPV	Zachvatkinia ovata	0
6198164	male	710	P6	DAV	Microspalax brevipes	1
6198164	male	710	P6	DAV	Zachvatkinia ovata	1
6198164	male	710	P6	PAV	Microspalax brevipes	7
6198164	male	710	P6	PAV	Zachvatkinia ovata	0
6198164	male	710	P7	DPV	Microspalax brevipes	25
6198164	male	710	P7	DPV	Zachvatkinia ovata	1
6198164	male	710	P7	PPV	Microspalax brevipes	20
6198164	male	710	P7	PPV	Zachvatkinia ovata	1
6198164	male	710	P7	DAV	Microspalax brevipes	2
6198164	male	710	P7	DAV	Zachvatkinia ovata	5
6198164	male	710	P7	PAV	Microspalax brevipes	3
6198164	male	710	P7	PAV	Zachvatkinia ovata	3
6198164	male	710	P8	DPV	Microspalax brevipes	2
6198164	male	710	P8	DPV	Zachvatkinia ovata	3
6198164	male	710	P8	PPV	Microspalax brevipes	0
6198164	male	710	P8	PPV	Zachvatkinia ovata	3
6198164	male	710	P8	DAV	Microspalax brevipes	0
6198164	male	710	P8	DAV	Zachvatkinia ovata	3
6198164	male	710	P8	PAV	Microspalax brevipes	0
6198164	male	710	P8	PAV	Zachvatkinia ovata	3
6198164	male	710	P9	DPV	Microspalax brevipes	0
6198164	male	710	P9	DPV	Zachvatkinia ovata	20
6198164	male	710	P9	PPV	Microspalax brevipes	0
6198164	male	710	P9	PPV	Zachvatkinia ovata	10
6198164	male	710	P9	DAV	Microspalax brevipes	0
6198164	male	710	P9	DAV	Zachvatkinia ovata	18
6198164	male	710	P9	PAV	Microspalax brevipes	0
6198164	male	710	P9	PAV	Zachvatkinia ovata	10
6198164	male	710	P10	DPV	Microspalax brevipes	0
6198164	male	710	P10	DPV	Zachvatkinia ovata	50
6198164	male	710	P10	PPV	Microspalax brevipes	0
6198164	male	710	P10	PPV	Zachvatkinia ovata	999
6198164	male	710	R1	PV	Microspalax brevipes	2
6198164	male	710	R1	PV	Zachvatkinia ovata	0
6198164	male	710	R1	AV	Microspalax brevipes	2
6198164	male	710	R1	AV	Zachvatkinia ovata	0
6198164	male	710	R2	PV	Microspalax brevipes	5
6198164	male	710	R2	PV	Zachvatkinia ovata	0
6198164	male	710	R2	AV	Microspalax brevipes	20
6198164	male	710	R2	AV	Zachvatkinia ovata	0
6198164	male	710	R3	PV	Microspalax brevipes	0
6198164	male	710	R3	PV	Zachvatkinia ovata	0
6198164	male	710	R3	AV	Microspalax brevipes	10
6198164	male	710	R3	AV	Zachvatkinia ovata	0
6198164	male	710	R4	PV	Microspalax brevipes	5
6198164	male	710	R4	PV	Zachvatkinia ovata	0
6198164	male	710	R4	AV	Microspalax brevipes	10
6198164	male	710	R4	AV	Zachvatkinia ovata	0
6198164	male	710	R5	PV	Microspalax brevipes	3
6198164	male	710	R5	PV	Zachvatkinia ovata	0
6198164	male	710	R5	AV	Microspalax brevipes	3
6198164	male	710	R5	AV	Zachvatkinia ovata	0
6198164	male	710	R6	PV	Microspalax brevipes	0
6198164	male	710	R6	PV	Zachvatkinia ovata	0
6198164	male	710	R6	AV	Microspalax brevipes	0
6198164	male	710	R6	AV	Zachvatkinia ovata	0
6175782	female	680	P1	DPV	Microspalax brevipes	0
6175782	female	680	P1	DPV	Zachvatkinia ovata	0
6175782	female	680	P1	PPV	Microspalax brevipes	0
6175782	female	680	P1	PPV	Zachvatkinia ovata	0
6175782	female	680	P1	DAV	Microspalax brevipes	0
6175782	female	680	P1	DAV	Zachvatkinia ovata	0
6175782	female	680	P1	PAV	Microspalax brevipes	0
6175782	female	680	P1	PAV	Zachvatkinia ovata	0
6175782	female	680	P2	DPV	Microspalax brevipes	2
6175782	female	680	P2	DPV	Zachvatkinia ovata	0
6175782	female	680	P2	PPV	Microspalax brevipes	0
6175782	female	680	P2	PPV	Zachvatkinia ovata	0
6175782	female	680	P2	DAV	Microspalax brevipes	1
6175782	female	680	P2	DAV	Zachvatkinia ovata	0
6175782	female	680	P2	PAV	Microspalax brevipes	0
6175782	female	680	P2	PAV	Zachvatkinia ovata	0
6175782	female	680	P3	DPV	Microspalax brevipes	7
6175782	female	680	P3	DPV	Zachvatkinia ovata	0
6175782	female	680	P3	PPV	Microspalax brevipes	0
6175782	female	680	P3	PPV	Zachvatkinia ovata	0
6175782	female	680	P3	DAV	Microspalax brevipes	4
6175782	female	680	P3	DAV	Zachvatkinia ovata	0
6175782	female	680	P3	PAV	Microspalax brevipes	1
6175782	female	680	P3	PAV	Zachvatkinia ovata	0
6175782	female	680	P4	DPV	Microspalax brevipes	65
6175782	female	680	P4	DPV	Zachvatkinia ovata	0
6175782	female	680	P4	PPV	Microspalax brevipes	4
6175782	female	680	P4	PPV	Zachvatkinia ovata	0
6175782	female	680	P4	DAV	Microspalax brevipes	16
6175782	female	680	P4	DAV	Zachvatkinia ovata	0
6175782	female	680	P4	PAV	Microspalax brevipes	0
6175782	female	680	P4	PAV	Zachvatkinia ovata	0
6175782	female	680	P5	DPV	Microspalax brevipes	999
6175782	female	680	P5	DPV	Zachvatkinia ovata	0
6175782	female	680	P5	PPV	Microspalax brevipes	33
6175782	female	680	P5	PPV	Zachvatkinia ovata	0
6175782	female	680	P5	DAV	Microspalax brevipes	60
6175782	female	680	P5	DAV	Zachvatkinia ovata	0
6175782	female	680	P5	PAV	Microspalax brevipes	12
6175782	female	680	P5	PAV	Zachvatkinia ovata	0
6175782	female	680	P6	DPV	Microspalax brevipes	999
6175782	female	680	P6	DPV	Zachvatkinia ovata	0
6175782	female	680	P6	PPV	Microspalax brevipes	999
6175782	female	680	P6	PPV	Zachvatkinia ovata	0
6175782	female	680	P6	DAV	Microspalax brevipes	50
6175782	female	680	P6	DAV	Zachvatkinia ovata	1
6175782	female	680	P6	PAV	Microspalax brevipes	40
6175782	female	680	P6	PAV	Zachvatkinia ovata	0
6175782	female	680	P7	DPV	Microspalax brevipes	999
6175782	female	680	P7	DPV	Zachvatkinia ovata	0
6175782	female	680	P7	PPV	Microspalax brevipes	999
6175782	female	680	P7	PPV	Zachvatkinia ovata	0
6175782	female	680	P7	DAV	Microspalax brevipes	15
6175782	female	680	P7	DAV	Zachvatkinia ovata	0
6175782	female	680	P7	PAV	Microspalax brevipes	6
6175782	female	680	P7	PAV	Zachvatkinia ovata	0
6175782	female	680	P8	DPV	Microspalax brevipes	999
6175782	female	680	P8	DPV	Zachvatkinia ovata	3
6175782	female	680	P8	PPV	Microspalax brevipes	999
6175782	female	680	P8	PPV	Zachvatkinia ovata	3
6175782	female	680	P8	DAV	Microspalax brevipes	1
6175782	female	680	P8	DAV	Zachvatkinia ovata	0
6175782	female	680	P8	PAV	Microspalax brevipes	1
6175782	female	680	P8	PAV	Zachvatkinia ovata	0
6175782	female	680	P9	DPV	Microspalax brevipes	60
6175782	female	680	P9	DPV	Zachvatkinia ovata	10
6175782	female	680	P9	PPV	Microspalax brevipes	4
6175782	female	680	P9	PPV	Zachvatkinia ovata	10
6175782	female	680	P9	DAV	Microspalax brevipes	0
6175782	female	680	P9	DAV	Zachvatkinia ovata	10
6175782	female	680	P9	PAV	Microspalax brevipes	0
6175782	female	680	P9	PAV	Zachvatkinia ovata	10
6175782	female	680	P10	DPV	Microspalax brevipes	0
6175782	female	680	P10	DPV	Zachvatkinia ovata	999
6175782	female	680	P10	PPV	Microspalax brevipes	0
6175782	female	680	P10	PPV	Zachvatkinia ovata	999
6175782	female	680	R1	PV	Microspalax brevipes	0
6175782	female	680	R1	PV	Zachvatkinia ovata	0
6175782	female	680	R1	AV	Microspalax brevipes	1
6175782	female	680	R1	AV	Zachvatkinia ovata	0
6175782	female	680	R2	PV	Microspalax brevipes	0
6175782	female	680	R2	PV	Zachvatkinia ovata	0
6175782	female	680	R2	AV	Microspalax brevipes	2
6175782	female	680	R2	AV	Zachvatkinia ovata	0
6175782	female	680	R3	PV	Microspalax brevipes	0
6175782	female	680	R3	PV	Zachvatkinia ovata	0
6175782	female	680	R3	AV	Microspalax brevipes	4
6175782	female	680	R3	AV	Zachvatkinia ovata	0
6175782	female	680	R4	PV	Microspalax brevipes	2
6175782	female	680	R4	PV	Zachvatkinia ovata	0
6175782	female	680	R4	AV	Microspalax brevipes	0
6175782	female	680	R4	AV	Zachvatkinia ovata	0
6175782	female	680	R5	PV	Microspalax brevipes	6
6175782	female	680	R5	PV	Zachvatkinia ovata	0
6175782	female	680	R5	AV	Microspalax brevipes	5
6175782	female	680	R5	AV	Zachvatkinia ovata	0
6175782	female	680	R6	PV	Microspalax brevipes	2
6175782	female	680	R6	PV	Zachvatkinia ovata	0
6175782	female	680	R6	AV	Microspalax brevipes	0
6175782	female	680	R6	AV	Zachvatkinia ovata	0
6188679	male	760	P1	DPV	Microspalax brevipes	52
6188679	male	760	P1	DPV	Zachvatkinia ovata	0
6188679	male	760	P1	PPV	Microspalax brevipes	10
6188679	male	760	P1	PPV	Zachvatkinia ovata	0
6188679	male	760	P1	DAV	Microspalax brevipes	40
6188679	male	760	P1	DAV	Zachvatkinia ovata	0
6188679	male	760	P1	PAV	Microspalax brevipes	10
6188679	male	760	P1	PAV	Zachvatkinia ovata	0
6188679	male	760	P2	DPV	Microspalax brevipes	95
6188679	male	760	P2	DPV	Zachvatkinia ovata	0
6188679	male	760	P2	PPV	Microspalax brevipes	18
6188679	male	760	P2	PPV	Zachvatkinia ovata	0
6188679	male	760	P2	DAV	Microspalax brevipes	50
6188679	male	760	P2	DAV	Zachvatkinia ovata	0
6188679	male	760	P2	PAV	Microspalax brevipes	15
6188679	male	760	P2	PAV	Zachvatkinia ovata	0
6188679	male	760	P3	DPV	Microspalax brevipes	80
6188679	male	760	P3	DPV	Zachvatkinia ovata	0
6188679	male	760	P3	PPV	Microspalax brevipes	18
6188679	male	760	P3	PPV	Zachvatkinia ovata	0
6188679	male	760	P3	DAV	Microspalax brevipes	39
6188679	male	760	P3	DAV	Zachvatkinia ovata	0
6188679	male	760	P3	PAV	Microspalax brevipes	13
6188679	male	760	P3	PAV	Zachvatkinia ovata	0
6188679	male	760	P4	DPV	Microspalax brevipes	999
6188679	male	760	P4	DPV	Zachvatkinia ovata	0
6188679	male	760	P4	PPV	Microspalax brevipes	26
6188679	male	760	P4	PPV	Zachvatkinia ovata	0
6188679	male	760	P4	DAV	Microspalax brevipes	32
6188679	male	760	P4	DAV	Zachvatkinia ovata	0
6188679	male	760	P4	PAV	Microspalax brevipes	21
6188679	male	760	P4	PAV	Zachvatkinia ovata	0
6188679	male	760	P5	DPV	Microspalax brevipes	50
6188679	male	760	P5	DPV	Zachvatkinia ovata	0
6188679	male	760	P5	PPV	Microspalax brevipes	27
6188679	male	760	P5	PPV	Zachvatkinia ovata	0
6188679	male	760	P5	DAV	Microspalax brevipes	8
6188679	male	760	P5	DAV	Zachvatkinia ovata	0
6188679	male	760	P5	PAV	Microspalax brevipes	9
6188679	male	760	P5	PAV	Zachvatkinia ovata	0
6188679	male	760	P6	DPV	Microspalax brevipes	18
6188679	male	760	P6	DPV	Zachvatkinia ovata	2
6188679	male	760	P6	PPV	Microspalax brevipes	7
6188679	male	760	P6	PPV	Zachvatkinia ovata	0
6188679	male	760	P6	DAV	Microspalax brevipes	0
6188679	male	760	P6	DAV	Zachvatkinia ovata	0
6188679	male	760	P6	PAV	Microspalax brevipes	6
6188679	male	760	P6	PAV	Zachvatkinia ovata	0
6188679	male	760	P7	DPV	Microspalax brevipes	5
6188679	male	760	P7	DPV	Zachvatkinia ovata	2
6188679	male	760	P7	PPV	Microspalax brevipes	1
6188679	male	760	P7	PPV	Zachvatkinia ovata	0
6188679	male	760	P7	DAV	Microspalax brevipes	0
6188679	male	760	P7	DAV	Zachvatkinia ovata	0
6188679	male	760	P7	PAV	Microspalax brevipes	1
6188679	male	760	P7	PAV	Zachvatkinia ovata	0
6188679	male	760	P8	DPV	Microspalax brevipes	0
6188679	male	760	P8	DPV	Zachvatkinia ovata	3
6188679	male	760	P8	PPV	Microspalax brevipes	0
6188679	male	760	P8	PPV	Zachvatkinia ovata	3
6188679	male	760	P8	DAV	Microspalax brevipes	0
6188679	male	760	P8	DAV	Zachvatkinia ovata	8
6188679	male	760	P8	PAV	Microspalax brevipes	0
6188679	male	760	P8	PAV	Zachvatkinia ovata	0
6188679	male	760	P9	DPV	Microspalax brevipes	0
6188679	male	760	P9	DPV	Zachvatkinia ovata	15
6188679	male	760	P9	PPV	Microspalax brevipes	0
6188679	male	760	P9	PPV	Zachvatkinia ovata	8
6188679	male	760	P9	DAV	Microspalax brevipes	0
6188679	male	760	P9	DAV	Zachvatkinia ovata	13
6188679	male	760	P9	PAV	Microspalax brevipes	0
6188679	male	760	P9	PAV	Zachvatkinia ovata	8
6188679	male	760	P10	DPV	Microspalax brevipes	0
6188679	male	760	P10	DPV	Zachvatkinia ovata	45
6188679	male	760	P10	PPV	Microspalax brevipes	0
6188679	male	760	P10	PPV	Zachvatkinia ovata	75
6188679	male	760	R1	PV	Microspalax brevipes	1
6188679	male	760	R1	PV	Zachvatkinia ovata	0
6188679	male	760	R1	AV	Microspalax brevipes	0
6188679	male	760	R1	AV	Zachvatkinia ovata	0
6188679	male	760	R2	PV	Microspalax brevipes	0
6188679	male	760	R2	PV	Zachvatkinia ovata	0
6188679	male	760	R2	AV	Microspalax brevipes	2
6188679	male	760	R2	AV	Zachvatkinia ovata	0
6188679	male	760	R3	PV	Microspalax brevipes	1
6188679	male	760	R3	PV	Zachvatkinia ovata	0
6188679	male	760	R3	AV	Microspalax brevipes	1
6188679	male	760	R3	AV	Zachvatkinia ovata	0
6188679	male	760	R4	PV	Microspalax brevipes	0
6188679	male	760	R4	PV	Zachvatkinia ovata	0
6188679	male	760	R4	AV	Microspalax brevipes	0
6188679	male	760	R4	AV	Zachvatkinia ovata	0
6188679	male	760	R5	PV	Microspalax brevipes	0
6188679	male	760	R5	PV	Zachvatkinia ovata	0
6188679	male	760	R5	AV	Microspalax brevipes	2
6188679	male	760	R5	AV	Zachvatkinia ovata	0
6188679	male	760	R6	PV	Microspalax brevipes	0
6188679	male	760	R6	PV	Zachvatkinia ovata	0
6188679	male	760	R6	AV	Microspalax brevipes	0
6188679	male	760	R6	AV	Zachvatkinia ovata	0
6140879	female	760	P1	DPV	Microspalax brevipes	0
6140879	female	760	P1	DPV	Zachvatkinia ovata	0
6140879	female	760	P1	PPV	Microspalax brevipes	0
6140879	female	760	P1	PPV	Zachvatkinia ovata	0
6140879	female	760	P1	DAV	Microspalax brevipes	0
6140879	female	760	P1	DAV	Zachvatkinia ovata	0
6140879	female	760	P1	PAV	Microspalax brevipes	0
6140879	female	760	P1	PAV	Zachvatkinia ovata	0
6140879	female	760	P2	DPV	Microspalax brevipes	4
6140879	female	760	P2	DPV	Zachvatkinia ovata	0
6140879	female	760	P2	PPV	Microspalax brevipes	0
6140879	female	760	P2	PPV	Zachvatkinia ovata	0
6140879	female	760	P2	DAV	Microspalax brevipes	0
6140879	female	760	P2	DAV	Zachvatkinia ovata	0
6140879	female	760	P2	PAV	Microspalax brevipes	0
6140879	female	760	P2	PAV	Zachvatkinia ovata	0
6140879	female	760	P3	DPV	Microspalax brevipes	12
6140879	female	760	P3	DPV	Zachvatkinia ovata	0
6140879	female	760	P3	PPV	Microspalax brevipes	0
6140879	female	760	P3	PPV	Zachvatkinia ovata	0
6140879	female	760	P3	DAV	Microspalax brevipes	0
6140879	female	760	P3	DAV	Zachvatkinia ovata	0
6140879	female	760	P3	PAV	Microspalax brevipes	0
6140879	female	760	P3	PAV	Zachvatkinia ovata	0
6140879	female	760	P4	DPV	Microspalax brevipes	57
6140879	female	760	P4	DPV	Zachvatkinia ovata	0
6140879	female	760	P4	PPV	Microspalax brevipes	2
6140879	female	760	P4	PPV	Zachvatkinia ovata	0
6140879	female	760	P4	DAV	Microspalax brevipes	6
6140879	female	760	P4	DAV	Zachvatkinia ovata	0
6140879	female	760	P4	PAV	Microspalax brevipes	0
6140879	female	760	P4	PAV	Zachvatkinia ovata	0
6140879	female	760	P5	DPV	Microspalax brevipes	999
6140879	female	760	P5	DPV	Zachvatkinia ovata	0
6140879	female	760	P5	PPV	Microspalax brevipes	30
6140879	female	760	P5	PPV	Zachvatkinia ovata	0
6140879	female	760	P5	DAV	Microspalax brevipes	4
6140879	female	760	P5	DAV	Zachvatkinia ovata	0
6140879	female	760	P5	PAV	Microspalax brevipes	0
6140879	female	760	P5	PAV	Zachvatkinia ovata	0
6140879	female	760	P6	DPV	Microspalax brevipes	999
6140879	female	760	P6	DPV	Zachvatkinia ovata	0
6140879	female	760	P6	PPV	Microspalax brevipes	72
6140879	female	760	P6	PPV	Zachvatkinia ovata	0
6140879	female	760	P6	DAV	Microspalax brevipes	1
6140879	female	760	P6	DAV	Zachvatkinia ovata	0
6140879	female	760	P6	PAV	Microspalax brevipes	1
6140879	female	760	P6	PAV	Zachvatkinia ovata	0
6140879	female	760	P7	DPV	Microspalax brevipes	999
6140879	female	760	P7	DPV	Zachvatkinia ovata	0
6140879	female	760	P7	PPV	Microspalax brevipes	80
6140879	female	760	P7	PPV	Zachvatkinia ovata	0
6140879	female	760	P7	DAV	Microspalax brevipes	0
6140879	female	760	P7	DAV	Zachvatkinia ovata	0
6140879	female	760	P7	PAV	Microspalax brevipes	0
6140879	female	760	P7	PAV	Zachvatkinia ovata	0
6140879	female	760	P8	DPV	Microspalax brevipes	56
6140879	female	760	P8	DPV	Zachvatkinia ovata	3
6140879	female	760	P8	PPV	Microspalax brevipes	2
6140879	female	760	P8	PPV	Zachvatkinia ovata	0
6140879	female	760	P8	DAV	Microspalax brevipes	0
6140879	female	760	P8	DAV	Zachvatkinia ovata	0
6140879	female	760	P8	PAV	Microspalax brevipes	0
6140879	female	760	P8	PAV	Zachvatkinia ovata	0
6140879	female	760	P9	DPV	Microspalax brevipes	8
6140879	female	760	P9	DPV	Zachvatkinia ovata	15
6140879	female	760	P9	PPV	Microspalax brevipes	1
6140879	female	760	P9	PPV	Zachvatkinia ovata	8
6140879	female	760	P9	DAV	Microspalax brevipes	0
6140879	female	760	P9	DAV	Zachvatkinia ovata	0
6140879	female	760	P9	PAV	Microspalax brevipes	0
6140879	female	760	P9	PAV	Zachvatkinia ovata	0
6140879	female	760	P10	DPV	Microspalax brevipes	0
6140879	female	760	P10	DPV	Zachvatkinia ovata	999
6140879	female	760	P10	PPV	Microspalax brevipes	0
6140879	female	760	P10	PPV	Zachvatkinia ovata	45
6140879	female	760	R1	PV	Microspalax brevipes	1
6140879	female	760	R1	PV	Zachvatkinia ovata	0
6140879	female	760	R1	AV	Microspalax brevipes	1
6140879	female	760	R1	AV	Zachvatkinia ovata	0
6140879	female	760	R2	PV	Microspalax brevipes	2
6140879	female	760	R2	PV	Zachvatkinia ovata	0
6140879	female	760	R2	AV	Microspalax brevipes	3
6140879	female	760	R2	AV	Zachvatkinia ovata	0
6140879	female	760	R3	PV	Microspalax brevipes	0
6140879	female	760	R3	PV	Zachvatkinia ovata	0
6140879	female	760	R3	AV	Microspalax brevipes	9
6140879	female	760	R3	AV	Zachvatkinia ovata	0
6140879	female	760	R4	PV	Microspalax brevipes	2
6140879	female	760	R4	PV	Zachvatkinia ovata	0
6140879	female	760	R4	AV	Microspalax brevipes	15
6140879	female	760	R4	AV	Zachvatkinia ovata	0
6140879	female	760	R5	PV	Microspalax brevipes	0
6140879	female	760	R5	PV	Zachvatkinia ovata	0
6140879	female	760	R5	AV	Microspalax brevipes	2
6140879	female	760	R5	AV	Zachvatkinia ovata	0
6140879	female	760	R6	PV	Microspalax brevipes	0
6140879	female	760	R6	PV	Zachvatkinia ovata	0
6140879	female	760	R6	AV	Microspalax brevipes	1
6140879	female	760	R6	AV	Zachvatkinia ovata	0
6106938	male	850	P1	DPV		777
6106938	male	850	P1	PPV		777
6106938	male	850	P1	DAV		777
6106938	male	850	P1	PAV		777
6106938	male	850	P2	DPV	Microspalax brevipes	80
6106938	male	850	P2	DPV	Zachvatkinia ovata	0
6106938	male	850	P2	PPV	Microspalax brevipes	14
6106938	male	850	P2	PPV	Zachvatkinia ovata	0
6106938	male	850	P2	DAV	Microspalax brevipes	40
6106938	male	850	P2	DAV	Zachvatkinia ovata	0
6106938	male	850	P2	PAV	Microspalax brevipes	20
6106938	male	850	P2	PAV	Zachvatkinia ovata	0
6106938	male	850	P3	DPV	Microspalax brevipes	999
6106938	male	850	P3	DPV	Zachvatkinia ovata	0
6106938	male	850	P3	PPV	Microspalax brevipes	16
6106938	male	850	P3	PPV	Zachvatkinia ovata	0
6106938	male	850	P3	DAV	Microspalax brevipes	70
6106938	male	850	P3	DAV	Zachvatkinia ovata	0
6106938	male	850	P3	PAV	Microspalax brevipes	17
6106938	male	850	P3	PAV	Zachvatkinia ovata	0
6106938	male	850	P4	DPV	Microspalax brevipes	999
6106938	male	850	P4	DPV	Zachvatkinia ovata	0
6106938	male	850	P4	PPV	Microspalax brevipes	28
6106938	male	850	P4	PPV	Zachvatkinia ovata	0
6106938	male	850	P4	DAV	Microspalax brevipes	20
6106938	male	850	P4	DAV	Zachvatkinia ovata	2
6106938	male	850	P4	PAV	Microspalax brevipes	17
6106938	male	850	P4	PAV	Zachvatkinia ovata	0
6106938	male	850	P5	DPV	Microspalax brevipes	999
6106938	male	850	P5	DPV	Zachvatkinia ovata	0
6106938	male	850	P5	PPV	Microspalax brevipes	35
6106938	male	850	P5	PPV	Zachvatkinia ovata	0
6106938	male	850	P5	DAV	Microspalax brevipes	15
6106938	male	850	P5	DAV	Zachvatkinia ovata	0
6106938	male	850	P5	PAV	Microspalax brevipes	13
6106938	male	850	P5	PAV	Zachvatkinia ovata	1
6106938	male	850	P6	DPV	Microspalax brevipes	60
6106938	male	850	P6	DPV	Zachvatkinia ovata	0
6106938	male	850	P6	PPV	Microspalax brevipes	10
6106938	male	850	P6	PPV	Zachvatkinia ovata	0
6106938	male	850	P6	DAV	Microspalax brevipes	5
6106938	male	850	P6	DAV	Zachvatkinia ovata	8
6106938	male	850	P6	PAV	Microspalax brevipes	2
6106938	male	850	P6	PAV	Zachvatkinia ovata	3
6106938	male	850	P7	DPV	Microspalax brevipes	34
6106938	male	850	P7	DPV	Zachvatkinia ovata	0
6106938	male	850	P7	PPV	Microspalax brevipes	9
6106938	male	850	P7	PPV	Zachvatkinia ovata	2
6106938	male	850	P7	DAV	Microspalax brevipes	0
6106938	male	850	P7	DAV	Zachvatkinia ovata	0
6106938	male	850	P7	PAV	Microspalax brevipes	1
6106938	male	850	P7	PAV	Zachvatkinia ovata	5
6106938	male	850	P8	DPV	Microspalax brevipes	0
6106938	male	850	P8	DPV	Zachvatkinia ovata	0
6106938	male	850	P8	PPV	Microspalax brevipes	0
6106938	male	850	P8	PPV	Zachvatkinia ovata	10
6106938	male	850	P8	DAV	Microspalax brevipes	0
6106938	male	850	P8	DAV	Zachvatkinia ovata	0
6106938	male	850	P8	PAV	Microspalax brevipes	0
6106938	male	850	P8	PAV	Zachvatkinia ovata	5
6106938	male	850	P9	DPV	Microspalax brevipes	0
6106938	male	850	P9	DPV	Zachvatkinia ovata	20
6106938	male	850	P9	PPV	Microspalax brevipes	0
6106938	male	850	P9	PPV	Zachvatkinia ovata	8
6106938	male	850	P9	DAV	Microspalax brevipes	0
6106938	male	850	P9	DAV	Zachvatkinia ovata	40
6106938	male	850	P9	PAV	Microspalax brevipes	0
6106938	male	850	P9	PAV	Zachvatkinia ovata	15
6106938	male	850	P10	DPV	Microspalax brevipes	0
6106938	male	850	P10	DPV	Zachvatkinia ovata	999
6106938	male	850	P10	PPV	Microspalax brevipes	0
6106938	male	850	P10	PPV	Zachvatkinia ovata	999
6106938	male	850	R1	PV	Microspalax brevipes	0
6106938	male	850	R1	PV	Zachvatkinia ovata	0
6106938	male	850	R1	AV	Microspalax brevipes	1
6106938	male	850	R1	AV	Zachvatkinia ovata	0
6106938	male	850	R2	PV	Microspalax brevipes	1
6106938	male	850	R2	PV	Zachvatkinia ovata	0
6106938	male	850	R2	AV	Microspalax brevipes	4
6106938	male	850	R2	AV	Zachvatkinia ovata	0
6106938	male	850	R3	PV	Microspalax brevipes	5
6106938	male	850	R3	PV	Zachvatkinia ovata	0
6106938	male	850	R3	AV	Microspalax brevipes	8
6106938	male	850	R3	AV	Zachvatkinia ovata	0
6106938	male	850	R4	PV	Microspalax brevipes	2
6106938	male	850	R4	PV	Zachvatkinia ovata	0
6106938	male	850	R4	AV	Microspalax brevipes	8
6106938	male	850	R4	AV	Zachvatkinia ovata	0
6106938	male	850	R5	PV	Microspalax brevipes	1
6106938	male	850	R5	PV	Zachvatkinia ovata	0
6106938	male	850	R5	AV	Microspalax brevipes	17
6106938	male	850	R5	AV	Zachvatkinia ovata	0
6106938	male	850	R6	PV	Microspalax brevipes	0
6106938	male	850	R6	PV	Zachvatkinia ovata	0
6106938	male	850	R6	AV	Microspalax brevipes	3
6106938	male	850	R6	AV	Zachvatkinia ovata	0
6198151	male	800	P1	DPV	Microspalax brevipes	14
6198151	male	800	P1	DPV	Zachvatkinia ovata	0
6198151	male	800	P1	PPV	Microspalax brevipes	4
6198151	male	800	P1	PPV	Zachvatkinia ovata	0
6198151	male	800	P1	DAV	Microspalax brevipes	1
6198151	male	800	P1	DAV	Zachvatkinia ovata	0
6198151	male	800	P1	PAV	Microspalax brevipes	1
6198151	male	800	P1	PAV	Zachvatkinia ovata	0
6198151	male	800	P2	DPV	Microspalax brevipes	30
6198151	male	800	P2	DPV	Zachvatkinia ovata	0
6198151	male	800	P2	PPV	Microspalax brevipes	1
6198151	male	800	P2	PPV	Zachvatkinia ovata	0
6198151	male	800	P2	DAV	Microspalax brevipes	12
6198151	male	800	P2	DAV	Zachvatkinia ovata	0
6198151	male	800	P2	PAV	Microspalax brevipes	3
6198151	male	800	P2	PAV	Zachvatkinia ovata	0
6198151	male	800	P3	DPV	Microspalax brevipes	68
6198151	male	800	P3	DPV	Zachvatkinia ovata	0
6198151	male	800	P3	PPV	Microspalax brevipes	2
6198151	male	800	P3	PPV	Zachvatkinia ovata	0
6198151	male	800	P3	DAV	Microspalax brevipes	25
6198151	male	800	P3	DAV	Zachvatkinia ovata	0
6198151	male	800	P3	PAV	Microspalax brevipes	10
6198151	male	800	P3	PAV	Zachvatkinia ovata	0
6198151	male	800	P4	DPV	Microspalax brevipes	80
6198151	male	800	P4	DPV	Zachvatkinia ovata	0
6198151	male	800	P4	PPV	Microspalax brevipes	20
6198151	male	800	P4	PPV	Zachvatkinia ovata	0
6198151	male	800	P4	DAV	Microspalax brevipes	30
6198151	male	800	P4	DAV	Zachvatkinia ovata	0
6198151	male	800	P4	PAV	Microspalax brevipes	14
6198151	male	800	P4	PAV	Zachvatkinia ovata	0
6198151	male	800	P5	DPV	Microspalax brevipes	85
6198151	male	800	P5	DPV	Zachvatkinia ovata	0
6198151	male	800	P5	PPV	Microspalax brevipes	34
6198151	male	800	P5	PPV	Zachvatkinia ovata	0
6198151	male	800	P5	DAV	Microspalax brevipes	7
6198151	male	800	P5	DAV	Zachvatkinia ovata	0
6198151	male	800	P5	PAV	Microspalax brevipes	10
6198151	male	800	P5	PAV	Zachvatkinia ovata	0
6198151	male	800	P6	DPV	Microspalax brevipes	999
6198151	male	800	P6	DPV	Zachvatkinia ovata	0
6198151	male	800	P6	PPV	Microspalax brevipes	36
6198151	male	800	P6	PPV	Zachvatkinia ovata	0
6198151	male	800	P6	DAV	Microspalax brevipes	10
6198151	male	800	P6	DAV	Zachvatkinia ovata	0
6198151	male	800	P6	PAV	Microspalax brevipes	17
6198151	male	800	P6	PAV	Zachvatkinia ovata	0
6198151	male	800	P7	DPV	Microspalax brevipes	85
6198151	male	800	P7	DPV	Zachvatkinia ovata	0
6198151	male	800	P7	PPV	Microspalax brevipes	53
6198151	male	800	P7	PPV	Zachvatkinia ovata	0
6198151	male	800	P7	DAV	Microspalax brevipes	2
6198151	male	800	P7	DAV	Zachvatkinia ovata	0
6198151	male	800	P7	PAV	Microspalax brevipes	6
6198151	male	800	P7	PAV	Zachvatkinia ovata	0
6198151	male	800	P8	DPV	Microspalax brevipes	42
6198151	male	800	P8	DPV	Zachvatkinia ovata	1
6198151	male	800	P8	PPV	Microspalax brevipes	20
6198151	male	800	P8	PPV	Zachvatkinia ovata	0
6198151	male	800	P8	DAV	Microspalax brevipes	0
6198151	male	800	P8	DAV	Zachvatkinia ovata	2
6198151	male	800	P8	PAV	Microspalax brevipes	0
6198151	male	800	P8	PAV	Zachvatkinia ovata	0
6198151	male	800	P9	DPV	Microspalax brevipes	23
6198151	male	800	P9	DPV	Zachvatkinia ovata	0
6198151	male	800	P9	PPV	Microspalax brevipes	11
6198151	male	800	P9	PPV	Zachvatkinia ovata	0
6198151	male	800	P9	DAV	Microspalax brevipes	0
6198151	male	800	P9	DAV	Zachvatkinia ovata	3
6198151	male	800	P9	PAV	Microspalax brevipes	3
6198151	male	800	P9	PAV	Zachvatkinia ovata	3
6198151	male	800	P10	DPV	Microspalax brevipes	0
6198151	male	800	P10	DPV	Zachvatkinia ovata	35
6198151	male	800	P10	PPV	Microspalax brevipes	1
6198151	male	800	P10	PPV	Zachvatkinia ovata	15
6198151	male	800	R1	PV	Microspalax brevipes	1
6198151	male	800	R1	PV	Zachvatkinia ovata	0
6198151	male	800	R1	AV	Microspalax brevipes	6
6198151	male	800	R1	AV	Zachvatkinia ovata	0
6198151	male	800	R2	PV	Microspalax brevipes	0
6198151	male	800	R2	PV	Zachvatkinia ovata	0
6198151	male	800	R2	AV	Microspalax brevipes	2
6198151	male	800	R2	AV	Zachvatkinia ovata	0
6198151	male	800	R3	PV	Microspalax brevipes	2
6198151	male	800	R3	PV	Zachvatkinia ovata	0
6198151	male	800	R3	AV	Microspalax brevipes	6
6198151	male	800	R3	AV	Zachvatkinia ovata	0
6198151	male	800	R4	PV	Microspalax brevipes	0
6198151	male	800	R4	PV	Zachvatkinia ovata	0
6198151	male	800	R4	AV	Microspalax brevipes	6
6198151	male	800	R4	AV	Zachvatkinia ovata	0
6198151	male	800	R5	PV	Microspalax brevipes	1
6198151	male	800	R5	PV	Zachvatkinia ovata	0
6198151	male	800	R5	AV	Microspalax brevipes	11
6198151	male	800	R5	AV	Zachvatkinia ovata	0
6198151	male	800	R6	PV	Microspalax brevipes	0
6198151	male	800	R6	PV	Zachvatkinia ovata	0
6198151	male	800	R6	AV	Microspalax brevipes	1
6198151	male	800	R6	AV	Zachvatkinia ovata	0
6140858	male	810	P1	DPV	Microspalax brevipes	4
6140858	male	810	P1	DPV	Zachvatkinia ovata	0
6140858	male	810	P1	PPV	Microspalax brevipes	0
6140858	male	810	P1	PPV	Zachvatkinia ovata	0
6140858	male	810	P1	DAV	Microspalax brevipes	0
6140858	male	810	P1	DAV	Zachvatkinia ovata	0
6140858	male	810	P1	PAV	Microspalax brevipes	0
6140858	male	810	P1	PAV	Zachvatkinia ovata	0
6140858	male	810	P2	DPV	Microspalax brevipes	52
6140858	male	810	P2	DPV	Zachvatkinia ovata	0
6140858	male	810	P2	PPV	Microspalax brevipes	2
6140858	male	810	P2	PPV	Zachvatkinia ovata	0
6140858	male	810	P2	DAV	Microspalax brevipes	21
6140858	male	810	P2	DAV	Zachvatkinia ovata	0
6140858	male	810	P2	PAV	Microspalax brevipes	3
6140858	male	810	P2	PAV	Zachvatkinia ovata	0
6140858	male	810	P3	DPV	Microspalax brevipes	999
6140858	male	810	P3	DPV	Zachvatkinia ovata	0
6140858	male	810	P3	PPV	Microspalax brevipes	26
6140858	male	810	P3	PPV	Zachvatkinia ovata	0
6140858	male	810	P3	DAV	Microspalax brevipes	50
6140858	male	810	P3	DAV	Zachvatkinia ovata	0
6140858	male	810	P3	PAV	Microspalax brevipes	12
6140858	male	810	P3	PAV	Zachvatkinia ovata	0
6140858	male	810	P4	DPV	Microspalax brevipes	999
6140858	male	810	P4	DPV	Zachvatkinia ovata	0
6140858	male	810	P4	PPV	Microspalax brevipes	67
6140858	male	810	P4	PPV	Zachvatkinia ovata	0
6140858	male	810	P4	DAV	Microspalax brevipes	45
6140858	male	810	P4	DAV	Zachvatkinia ovata	0
6140858	male	810	P4	PAV	Microspalax brevipes	9
6140858	male	810	P4	PAV	Zachvatkinia ovata	0
6140858	male	810	P5	DPV	Microspalax brevipes	999
6140858	male	810	P5	DPV	Zachvatkinia ovata	0
6140858	male	810	P5	PPV	Microspalax brevipes	999
6140858	male	810	P5	PPV	Zachvatkinia ovata	0
6140858	male	810	P5	DAV	Microspalax brevipes	8
6140858	male	810	P5	DAV	Zachvatkinia ovata	0
6140858	male	810	P5	PAV	Microspalax brevipes	5
6140858	male	810	P5	PAV	Zachvatkinia ovata	0
6140858	male	810	P6	DPV	Microspalax brevipes	999
6140858	male	810	P6	DPV	Zachvatkinia ovata	3
6140858	male	810	P6	PPV	Microspalax brevipes	999
6140858	male	810	P6	PPV	Zachvatkinia ovata	0
6140858	male	810	P6	DAV	Microspalax brevipes	0
6140858	male	810	P6	DAV	Zachvatkinia ovata	3
6140858	male	810	P6	PAV	Microspalax brevipes	2
6140858	male	810	P6	PAV	Zachvatkinia ovata	0
6140858	male	810	P7	DPV	Microspalax brevipes	999
6140858	male	810	P7	DPV	Zachvatkinia ovata	3
6140858	male	810	P7	PPV	Microspalax brevipes	11
6140858	male	810	P7	PPV	Zachvatkinia ovata	0
6140858	male	810	P7	DAV	Microspalax brevipes	0
6140858	male	810	P7	DAV	Zachvatkinia ovata	3
6140858	male	810	P7	PAV	Microspalax brevipes	0
6140858	male	810	P7	PAV	Zachvatkinia ovata	0
6140858	male	810	P8	DPV	Microspalax brevipes	14
6140858	male	810	P8	DPV	Zachvatkinia ovata	3
6140858	male	810	P8	PPV	Microspalax brevipes	1
6140858	male	810	P8	PPV	Zachvatkinia ovata	0
6140858	male	810	P8	DAV	Microspalax brevipes	0
6140858	male	810	P8	DAV	Zachvatkinia ovata	8
6140858	male	810	P8	PAV	Microspalax brevipes	0
6140858	male	810	P8	PAV	Zachvatkinia ovata	0
6140858	male	810	P9	DPV	Microspalax brevipes	1
6140858	male	810	P9	DPV	Zachvatkinia ovata	3
6140858	male	810	P9	PPV	Microspalax brevipes	0
6140858	male	810	P9	PPV	Zachvatkinia ovata	0
6140858	male	810	P9	DAV	Microspalax brevipes	0
6140858	male	810	P9	DAV	Zachvatkinia ovata	25
6140858	male	810	P9	PAV	Microspalax brevipes	0
6140858	male	810	P9	PAV	Zachvatkinia ovata	10
6140858	male	810	P10	DPV	Microspalax brevipes	0
6140858	male	810	P10	DPV	Zachvatkinia ovata	50
6140858	male	810	P10	PPV	Microspalax brevipes	2
6140858	male	810	P10	PPV	Zachvatkinia ovata	50
6140858	male	810	R1	PV	Microspalax brevipes	1
6140858	male	810	R1	PV	Zachvatkinia ovata	0
6140858	male	810	R1	AV	Microspalax brevipes	5
6140858	male	810	R1	AV	Zachvatkinia ovata	0
6140858	male	810	R2	PV	Microspalax brevipes	0
6140858	male	810	R2	PV	Zachvatkinia ovata	0
6140858	male	810	R2	AV	Microspalax brevipes	0
6140858	male	810	R2	AV	Zachvatkinia ovata	0
6140858	male	810	R3	PV	Microspalax brevipes	0
6140858	male	810	R3	PV	Zachvatkinia ovata	0
6140858	male	810	R3	AV	Microspalax brevipes	2
6140858	male	810	R3	AV	Zachvatkinia ovata	0
6140858	male	810	R4	PV	Microspalax brevipes	0
6140858	male	810	R4	PV	Zachvatkinia ovata	0
6140858	male	810	R4	AV	Microspalax brevipes	1
6140858	male	810	R4	AV	Zachvatkinia ovata	0
6140858	male	810	R5	PV	Microspalax brevipes	0
6140858	male	810	R5	PV	Zachvatkinia ovata	0
6140858	male	810	R5	AV	Microspalax brevipes	0
6140858	male	810	R5	AV	Zachvatkinia ovata	0
6140858	male	810	R6	PV	Microspalax brevipes	0
6140858	male	810	R6	PV	Zachvatkinia ovata	0
6140858	male	810	R6	AV	Microspalax brevipes	0
6140858	male	810	R6	AV	Zachvatkinia ovata	0
6140729	female	725	P1	DPV	Microspalax brevipes	3
6140729	female	725	P1	DPV	Zachvatkinia ovata	0
6140729	female	725	P1	PPV	Microspalax brevipes	0
6140729	female	725	P1	PPV	Zachvatkinia ovata	0
6140729	female	725	P1	DAV	Microspalax brevipes	0
6140729	female	725	P1	DAV	Zachvatkinia ovata	0
6140729	female	725	P1	PAV	Microspalax brevipes	0
6140729	female	725	P1	PAV	Zachvatkinia ovata	0
6140729	female	725	P2	DPV	Microspalax brevipes	30
6140729	female	725	P2	DPV	Zachvatkinia ovata	0
6140729	female	725	P2	PPV	Microspalax brevipes	1
6140729	female	725	P2	PPV	Zachvatkinia ovata	0
6140729	female	725	P2	DAV	Microspalax brevipes	15
6140729	female	725	P2	DAV	Zachvatkinia ovata	0
6140729	female	725	P2	PAV	Microspalax brevipes	1
6140729	female	725	P2	PAV	Zachvatkinia ovata	0
6140729	female	725	P3	DPV	Microspalax brevipes	71
6140729	female	725	P3	DPV	Zachvatkinia ovata	0
6140729	female	725	P3	PPV	Microspalax brevipes	0
6140729	female	725	P3	PPV	Zachvatkinia ovata	0
6140729	female	725	P3	DAV	Microspalax brevipes	46
6140729	female	725	P3	DAV	Zachvatkinia ovata	0
6140729	female	725	P3	PAV	Microspalax brevipes	1
6140729	female	725	P3	PAV	Zachvatkinia ovata	0
6140729	female	725	P4	DPV	Microspalax brevipes	999
6140729	female	725	P4	DPV	Zachvatkinia ovata	0
6140729	female	725	P4	PPV	Microspalax brevipes	35
6140729	female	725	P4	PPV	Zachvatkinia ovata	0
6140729	female	725	P4	DAV	Microspalax brevipes	70
6140729	female	725	P4	DAV	Zachvatkinia ovata	0
6140729	female	725	P4	PAV	Microspalax brevipes	15
6140729	female	725	P4	PAV	Zachvatkinia ovata	0
6140729	female	725	P5	DPV	Microspalax brevipes	999
6140729	female	725	P5	DPV	Zachvatkinia ovata	3
6140729	female	725	P5	PPV	Microspalax brevipes	999
6140729	female	725	P5	PPV	Zachvatkinia ovata	3
6140729	female	725	P5	DAV	Microspalax brevipes	30
6140729	female	725	P5	DAV	Zachvatkinia ovata	8
6140729	female	725	P5	PAV	Microspalax brevipes	20
6140729	female	725	P5	PAV	Zachvatkinia ovata	3
6140729	female	725	P6	DPV	Microspalax brevipes	999
6140729	female	725	P6	DPV	Zachvatkinia ovata	5
6140729	female	725	P6	PPV	Microspalax brevipes	61
6140729	female	725	P6	PPV	Zachvatkinia ovata	5
6140729	female	725	P6	DAV	Microspalax brevipes	1
6140729	female	725	P6	DAV	Zachvatkinia ovata	5
6140729	female	725	P6	PAV	Microspalax brevipes	4
6140729	female	725	P6	PAV	Zachvatkinia ovata	0
6140729	female	725	P7	DPV	Microspalax brevipes	56
6140729	female	725	P7	DPV	Zachvatkinia ovata	8
6140729	female	725	P7	PPV	Microspalax brevipes	10
6140729	female	725	P7	PPV	Zachvatkinia ovata	5
6140729	female	725	P7	DAV	Microspalax brevipes	0
6140729	female	725	P7	DAV	Zachvatkinia ovata	0
6140729	female	725	P7	PAV	Microspalax brevipes	1
6140729	female	725	P7	PAV	Zachvatkinia ovata	0
6140729	female	725	P8	DPV	Microspalax brevipes	45
6140729	female	725	P8	DPV	Zachvatkinia ovata	10
6140729	female	725	P8	PPV	Microspalax brevipes	12
6140729	female	725	P8	PPV	Zachvatkinia ovata	8
6140729	female	725	P8	DAV	Microspalax brevipes	0
6140729	female	725	P8	DAV	Zachvatkinia ovata	10
6140729	female	725	P8	PAV	Microspalax brevipes	3
6140729	female	725	P8	PAV	Zachvatkinia ovata	0
6140729	female	725	P9	DPV	Microspalax brevipes	0
6140729	female	725	P9	DPV	Zachvatkinia ovata	20
6140729	female	725	P9	PPV	Microspalax brevipes	3
6140729	female	725	P9	PPV	Zachvatkinia ovata	10
6140729	female	725	P9	DAV	Microspalax brevipes	0
6140729	female	725	P9	DAV	Zachvatkinia ovata	30
6140729	female	725	P9	PAV	Microspalax brevipes	0
6140729	female	725	P9	PAV	Zachvatkinia ovata	25
6140729	female	725	P10	DPV	Microspalax brevipes	0
6140729	female	725	P10	DPV	Zachvatkinia ovata	999
6140729	female	725	P10	PPV	Microspalax brevipes	0
6140729	female	725	P10	PPV	Zachvatkinia ovata	999
6140729	female	725	R1	PV	Microspalax brevipes	0
6140729	female	725	R1	PV	Zachvatkinia ovata	0
6140729	female	725	R1	AV	Microspalax brevipes	0
6140729	female	725	R1	AV	Zachvatkinia ovata	0
6140729	female	725	R2	PV	Microspalax brevipes	1
6140729	female	725	R2	PV	Zachvatkinia ovata	0
6140729	female	725	R2	AV	Microspalax brevipes	3
6140729	female	725	R2	AV	Zachvatkinia ovata	0
6140729	female	725	R3	PV	Microspalax brevipes	1
6140729	female	725	R3	PV	Zachvatkinia ovata	0
6140729	female	725	R3	AV	Microspalax brevipes	2
6140729	female	725	R3	AV	Zachvatkinia ovata	0
6140729	female	725	R4	PV	Microspalax brevipes	0
6140729	female	725	R4	PV	Zachvatkinia ovata	0
6140729	female	725	R4	AV	Microspalax brevipes	0
6140729	female	725	R4	AV	Zachvatkinia ovata	0
6140729	female	725	R5	PV	Microspalax brevipes	2
6140729	female	725	R5	PV	Zachvatkinia ovata	0
6140729	female	725	R5	AV	Microspalax brevipes	5
6140729	female	725	R5	AV	Zachvatkinia ovata	0
6140729	female	725	R6	PV	Microspalax brevipes	1
6140729	female	725	R6	PV	Zachvatkinia ovata	0
6140729	female	725	R6	AV	Microspalax brevipes	4
6140729	female	725	R6	AV	Zachvatkinia ovata	0
6140785	female	730	P1	DPV	Microspalax brevipes	4
6140785	female	730	P1	DPV	Zachvatkinia ovata	0
6140785	female	730	P1	PPV	Microspalax brevipes	0
6140785	female	730	P1	PPV	Zachvatkinia ovata	0
6140785	female	730	P1	DAV	Microspalax brevipes	0
6140785	female	730	P1	DAV	Zachvatkinia ovata	0
6140785	female	730	P1	PAV	Microspalax brevipes	0
6140785	female	730	P1	PAV	Zachvatkinia ovata	0
6140785	female	730	P2	DPV	Microspalax brevipes	10
6140785	female	730	P2	DPV	Zachvatkinia ovata	0
6140785	female	730	P2	PPV	Microspalax brevipes	0
6140785	female	730	P2	PPV	Zachvatkinia ovata	0
6140785	female	730	P2	DAV	Microspalax brevipes	8
6140785	female	730	P2	DAV	Zachvatkinia ovata	0
6140785	female	730	P2	PAV	Microspalax brevipes	0
6140785	female	730	P2	PAV	Zachvatkinia ovata	0
6140785	female	730	P3	DPV	Microspalax brevipes	66
6140785	female	730	P3	DPV	Zachvatkinia ovata	0
6140785	female	730	P3	PPV	Microspalax brevipes	9
6140785	female	730	P3	PPV	Zachvatkinia ovata	0
6140785	female	730	P3	DAV	Microspalax brevipes	18
6140785	female	730	P3	DAV	Zachvatkinia ovata	0
6140785	female	730	P3	PAV	Microspalax brevipes	12
6140785	female	730	P3	PAV	Zachvatkinia ovata	0
6140785	female	730	P4	DPV	Microspalax brevipes	999
6140785	female	730	P4	DPV	Zachvatkinia ovata	0
6140785	female	730	P4	PPV	Microspalax brevipes	46
6140785	female	730	P4	PPV	Zachvatkinia ovata	0
6140785	female	730	P4	DAV	Microspalax brevipes	38
6140785	female	730	P4	DAV	Zachvatkinia ovata	0
6140785	female	730	P4	PAV	Microspalax brevipes	10
6140785	female	730	P4	PAV	Zachvatkinia ovata	0
6140785	female	730	P5	DPV	Microspalax brevipes	999
6140785	female	730	P5	DPV	Zachvatkinia ovata	0
6140785	female	730	P5	PPV	Microspalax brevipes	90
6140785	female	730	P5	PPV	Zachvatkinia ovata	0
6140785	female	730	P5	DAV	Microspalax brevipes	25
6140785	female	730	P5	DAV	Zachvatkinia ovata	0
6140785	female	730	P5	PAV	Microspalax brevipes	32
6140785	female	730	P5	PAV	Zachvatkinia ovata	0
6140785	female	730	P6	DPV	Microspalax brevipes	999
6140785	female	730	P6	DPV	Zachvatkinia ovata	0
6140785	female	730	P6	PPV	Microspalax brevipes	999
6140785	female	730	P6	PPV	Zachvatkinia ovata	1
6140785	female	730	P6	DAV	Microspalax brevipes	8
6140785	female	730	P6	DAV	Zachvatkinia ovata	0
6140785	female	730	P6	PAV	Microspalax brevipes	40
6140785	female	730	P6	PAV	Zachvatkinia ovata	2
6140785	female	730	P7	DPV	Microspalax brevipes	999
6140785	female	730	P7	DPV	Zachvatkinia ovata	0
6140785	female	730	P7	PPV	Microspalax brevipes	70
6140785	female	730	P7	PPV	Zachvatkinia ovata	1
6140785	female	730	P7	DAV	Microspalax brevipes	0
6140785	female	730	P7	DAV	Zachvatkinia ovata	0
6140785	female	730	P7	PAV	Microspalax brevipes	2
6140785	female	730	P7	PAV	Zachvatkinia ovata	1
6140785	female	730	P8	DPV	Microspalax brevipes	55
6140785	female	730	P8	DPV	Zachvatkinia ovata	0
6140785	female	730	P8	PPV	Microspalax brevipes	2
6140785	female	730	P8	PPV	Zachvatkinia ovata	0
6140785	female	730	P8	DAV	Microspalax brevipes	0
6140785	female	730	P8	DAV	Zachvatkinia ovata	5
6140785	female	730	P8	PAV	Microspalax brevipes	0
6140785	female	730	P8	PAV	Zachvatkinia ovata	1
6140785	female	730	P9	DPV	Microspalax brevipes	8
6140785	female	730	P9	DPV	Zachvatkinia ovata	8
6140785	female	730	P9	PPV	Microspalax brevipes	1
6140785	female	730	P9	PPV	Zachvatkinia ovata	8
6140785	female	730	P9	DAV	Microspalax brevipes	0
6140785	female	730	P9	DAV	Zachvatkinia ovata	3
6140785	female	730	P9	PAV	Microspalax brevipes	0
6140785	female	730	P9	PAV	Zachvatkinia ovata	3
6140785	female	730	P10	DPV	Microspalax brevipes	0
6140785	female	730	P10	DPV	Zachvatkinia ovata	999
6140785	female	730	P10	PPV	Microspalax brevipes	0
6140785	female	730	P10	PPV	Zachvatkinia ovata	999
6140785	female	730	R1	PV	Microspalax brevipes	1
6140785	female	730	R1	PV	Zachvatkinia ovata	0
6140785	female	730	R1	AV	Microspalax brevipes	2
6140785	female	730	R1	AV	Zachvatkinia ovata	0
6140785	female	730	R2	PV	Microspalax brevipes	0
6140785	female	730	R2	PV	Zachvatkinia ovata	0
6140785	female	730	R2	AV	Microspalax brevipes	1
6140785	female	730	R2	AV	Zachvatkinia ovata	0
6140785	female	730	R3	PV	Microspalax brevipes	0
6140785	female	730	R3	PV	Zachvatkinia ovata	0
6140785	female	730	R3	AV	Microspalax brevipes	4
6140785	female	730	R3	AV	Zachvatkinia ovata	0
6140785	female	730	R4	PV	Microspalax brevipes	0
6140785	female	730	R4	PV	Zachvatkinia ovata	0
6140785	female	730	R4	AV	Microspalax brevipes	1
6140785	female	730	R4	AV	Zachvatkinia ovata	0
6140785	female	730	R5	PV	Microspalax brevipes	2
6140785	female	730	R5	PV	Zachvatkinia ovata	0
6140785	female	730	R5	AV	Microspalax brevipes	0
6140785	female	730	R5	AV	Zachvatkinia ovata	0
6140785	female	730	R6	PV	Microspalax brevipes	6
6140785	female	730	R6	PV	Zachvatkinia ovata	0
6140785	female	730	R6	AV	Microspalax brevipes	1
6140785	female	730	R6	AV	Zachvatkinia ovata	0
6106947	female	810	P1	DPV	Microspalax brevipes	11
6106947	female	810	P1	DPV	Zachvatkinia ovata	0
6106947	female	810	P1	PPV	Microspalax brevipes	0
6106947	female	810	P1	PPV	Zachvatkinia ovata	0
6106947	female	810	P1	DAV	Microspalax brevipes	15
6106947	female	810	P1	DAV	Zachvatkinia ovata	0
6106947	female	810	P1	PAV	Microspalax brevipes	0
6106947	female	810	P1	PAV	Zachvatkinia ovata	0
6106947	female	810	P2	DPV	Microspalax brevipes	85
6106947	female	810	P2	DPV	Zachvatkinia ovata	0
6106947	female	810	P2	PPV	Microspalax brevipes	0
6106947	female	810	P2	PPV	Zachvatkinia ovata	0
6106947	female	810	P2	DAV	Microspalax brevipes	75
6106947	female	810	P2	DAV	Zachvatkinia ovata	0
6106947	female	810	P2	PAV	Microspalax brevipes	4
6106947	female	810	P2	PAV	Zachvatkinia ovata	0
6106947	female	810	P3	DPV	Microspalax brevipes	999
6106947	female	810	P3	DPV	Zachvatkinia ovata	0
6106947	female	810	P3	PPV	Microspalax brevipes	5
6106947	female	810	P3	PPV	Zachvatkinia ovata	0
6106947	female	810	P3	DAV	Microspalax brevipes	95
6106947	female	810	P3	DAV	Zachvatkinia ovata	0
6106947	female	810	P3	PAV	Microspalax brevipes	15
6106947	female	810	P3	PAV	Zachvatkinia ovata	0
6106947	female	810	P4	DPV	Microspalax brevipes	999
6106947	female	810	P4	DPV	Zachvatkinia ovata	0
6106947	female	810	P4	PPV	Microspalax brevipes	24
6106947	female	810	P4	PPV	Zachvatkinia ovata	0
6106947	female	810	P4	DAV	Microspalax brevipes	80
6106947	female	810	P4	DAV	Zachvatkinia ovata	1
6106947	female	810	P4	PAV	Microspalax brevipes	0
6106947	female	810	P4	PAV	Zachvatkinia ovata	30
6106947	female	810	P5	DPV	Microspalax brevipes	999
6106947	female	810	P5	DPV	Zachvatkinia ovata	10
6106947	female	810	P5	PPV	Microspalax brevipes	50
6106947	female	810	P5	PPV	Zachvatkinia ovata	0
6106947	female	810	P5	DAV	Microspalax brevipes	40
6106947	female	810	P5	DAV	Zachvatkinia ovata	8
6106947	female	810	P5	PAV	Microspalax brevipes	7
6106947	female	810	P5	PAV	Zachvatkinia ovata	0
6106947	female	810	P6	DPV	Microspalax brevipes	999
6106947	female	810	P6	DPV	Zachvatkinia ovata	10
6106947	female	810	P6	PPV	Microspalax brevipes	26
6106947	female	810	P6	PPV	Zachvatkinia ovata	1
6106947	female	810	P6	DAV	Microspalax brevipes	8
6106947	female	810	P6	DAV	Zachvatkinia ovata	15
6106947	female	810	P6	PAV	Microspalax brevipes	1
6106947	female	810	P6	PAV	Zachvatkinia ovata	5
6106947	female	810	P7	DPV	Microspalax brevipes	80
6106947	female	810	P7	DPV	Zachvatkinia ovata	35
6106947	female	810	P7	PPV	Microspalax brevipes	15
6106947	female	810	P7	PPV	Zachvatkinia ovata	5
6106947	female	810	P7	DAV	Microspalax brevipes	0
6106947	female	810	P7	DAV	Zachvatkinia ovata	35
6106947	female	810	P7	PAV	Microspalax brevipes	2
6106947	female	810	P7	PAV	Zachvatkinia ovata	10
6106947	female	810	P8	DPV	Microspalax brevipes	5
6106947	female	810	P8	DPV	Zachvatkinia ovata	55
6106947	female	810	P8	PPV	Microspalax brevipes	10
6106947	female	810	P8	PPV	Zachvatkinia ovata	10
6106947	female	810	P8	DAV	Microspalax brevipes	0
6106947	female	810	P8	DAV	Zachvatkinia ovata	45
6106947	female	810	P8	PAV	Microspalax brevipes	0
6106947	female	810	P8	PAV	Zachvatkinia ovata	15
6106947	female	810	P9	DPV	Microspalax brevipes	2
6106947	female	810	P9	DPV	Zachvatkinia ovata	999
6106947	female	810	P9	PPV	Microspalax brevipes	1
6106947	female	810	P9	PPV	Zachvatkinia ovata	15
6106947	female	810	P9	DAV	Microspalax brevipes	0
6106947	female	810	P9	DAV	Zachvatkinia ovata	50
6106947	female	810	P9	PAV	Microspalax brevipes	0
6106947	female	810	P9	PAV	Zachvatkinia ovata	50
6106947	female	810	P10	DPV	Microspalax brevipes	0
6106947	female	810	P10	DPV	Zachvatkinia ovata	999
6106947	female	810	P10	PPV	Microspalax brevipes	0
6106947	female	810	P10	PPV	Zachvatkinia ovata	999
6106947	female	810	R1	PV	Microspalax brevipes	0
6106947	female	810	R1	PV	Zachvatkinia ovata	0
6106947	female	810	R1	AV	Microspalax brevipes	11
6106947	female	810	R1	AV	Zachvatkinia ovata	0
6106947	female	810	R2	PV	Microspalax brevipes	2
6106947	female	810	R2	PV	Zachvatkinia ovata	0
6106947	female	810	R2	AV	Microspalax brevipes	5
6106947	female	810	R2	AV	Zachvatkinia ovata	0
6106947	female	810	R3	PV	Microspalax brevipes	1
6106947	female	810	R3	PV	Zachvatkinia ovata	0
6106947	female	810	R3	AV	Microspalax brevipes	4
6106947	female	810	R3	AV	Zachvatkinia ovata	0
6106947	female	810	R4	PV	Microspalax brevipes	1
6106947	female	810	R4	PV	Zachvatkinia ovata	0
6106947	female	810	R4	AV	Microspalax brevipes	14
6106947	female	810	R4	AV	Zachvatkinia ovata	0
6106947	female	810	R5	PV	Microspalax brevipes	1
6106947	female	810	R5	PV	Zachvatkinia ovata	1
6106947	female	810	R5	AV	Microspalax brevipes	8
6106947	female	810	R5	AV	Zachvatkinia ovata	0
6106947	female	810	R6	PV	Microspalax brevipes	3
6106947	female	810	R6	PV	Zachvatkinia ovata	0
6106947	female	810	R6	AV	Microspalax brevipes	3
6106947	female	810	R6	AV	Zachvatkinia ovata	0
6143073	male	780	P1	DPV	Microspalax brevipes	0
6143073	male	780	P1	DPV	Zachvatkinia ovata	0
6143073	male	780	P1	PPV	Microspalax brevipes	0
6143073	male	780	P1	PPV	Zachvatkinia ovata	0
6143073	male	780	P1	DAV	Microspalax brevipes	0
6143073	male	780	P1	DAV	Zachvatkinia ovata	0
6143073	male	780	P1	PAV	Microspalax brevipes	0
6143073	male	780	P1	PAV	Zachvatkinia ovata	0
6143073	male	780	P2	DPV	Microspalax brevipes	0
6143073	male	780	P2	DPV	Zachvatkinia ovata	0
6143073	male	780	P2	PPV	Microspalax brevipes	0
6143073	male	780	P2	PPV	Zachvatkinia ovata	0
6143073	male	780	P2	DAV	Microspalax brevipes	0
6143073	male	780	P2	DAV	Zachvatkinia ovata	0
6143073	male	780	P2	PAV	Microspalax brevipes	0
6143073	male	780	P2	PAV	Zachvatkinia ovata	0
6143073	male	780	P3	DPV	Microspalax brevipes	0
6143073	male	780	P3	DPV	Zachvatkinia ovata	0
6143073	male	780	P3	PPV	Microspalax brevipes	0
6143073	male	780	P3	PPV	Zachvatkinia ovata	0
6143073	male	780	P3	DAV	Microspalax brevipes	0
6143073	male	780	P3	DAV	Zachvatkinia ovata	0
6143073	male	780	P3	PAV	Microspalax brevipes	0
6143073	male	780	P3	PAV	Zachvatkinia ovata	0
6143073	male	780	P4	DPV	Microspalax brevipes	0
6143073	male	780	P4	DPV	Zachvatkinia ovata	0
6143073	male	780	P4	PPV	Microspalax brevipes	0
6143073	male	780	P4	PPV	Zachvatkinia ovata	0
6143073	male	780	P4	DAV	Microspalax brevipes	0
6143073	male	780	P4	DAV	Zachvatkinia ovata	0
6143073	male	780	P4	PAV	Microspalax brevipes	0
6143073	male	780	P4	PAV	Zachvatkinia ovata	0
6143073	male	780	P5	DPV	Microspalax brevipes	0
6143073	male	780	P5	DPV	Zachvatkinia ovata	0
6143073	male	780	P5	PPV	Microspalax brevipes	0
6143073	male	780	P5	PPV	Zachvatkinia ovata	0
6143073	male	780	P5	DAV	Microspalax brevipes	0
6143073	male	780	P5	DAV	Zachvatkinia ovata	0
6143073	male	780	P5	PAV	Microspalax brevipes	0
6143073	male	780	P5	PAV	Zachvatkinia ovata	0
6143073	male	780	P6	DPV	Microspalax brevipes	1
6143073	male	780	P6	DPV	Zachvatkinia ovata	0
6143073	male	780	P6	PPV	Microspalax brevipes	0
6143073	male	780	P6	PPV	Zachvatkinia ovata	0
6143073	male	780	P6	DAV	Microspalax brevipes	0
6143073	male	780	P6	DAV	Zachvatkinia ovata	0
6143073	male	780	P6	PAV	Microspalax brevipes	0
6143073	male	780	P6	PAV	Zachvatkinia ovata	0
6143073	male	780	P7	DPV	Microspalax brevipes	0
6143073	male	780	P7	DPV	Zachvatkinia ovata	0
6143073	male	780	P7	PPV	Microspalax brevipes	0
6143073	male	780	P7	PPV	Zachvatkinia ovata	0
6143073	male	780	P7	DAV	Microspalax brevipes	0
6143073	male	780	P7	DAV	Zachvatkinia ovata	0
6143073	male	780	P7	PAV	Microspalax brevipes	0
6143073	male	780	P7	PAV	Zachvatkinia ovata	0
6143073	male	780	P8	DPV	Microspalax brevipes	0
6143073	male	780	P8	DPV	Zachvatkinia ovata	0
6143073	male	780	P8	PPV	Microspalax brevipes	0
6143073	male	780	P8	PPV	Zachvatkinia ovata	0
6143073	male	780	P8	DAV	Microspalax brevipes	0
6143073	male	780	P8	DAV	Zachvatkinia ovata	0
6143073	male	780	P8	PAV	Microspalax brevipes	0
6143073	male	780	P8	PAV	Zachvatkinia ovata	0
6143073	male	780	P9	DPV	Microspalax brevipes	0
6143073	male	780	P9	DPV	Zachvatkinia ovata	0
6143073	male	780	P9	PPV	Microspalax brevipes	0
6143073	male	780	P9	PPV	Zachvatkinia ovata	0
6143073	male	780	P9	DAV	Microspalax brevipes	0
6143073	male	780	P9	DAV	Zachvatkinia ovata	0
6143073	male	780	P9	PAV	Microspalax brevipes	0
6143073	male	780	P9	PAV	Zachvatkinia ovata	0
6143073	male	780	P10	DPV	Microspalax brevipes	0
6143073	male	780	P10	DPV	Zachvatkinia ovata	8
6143073	male	780	P10	PPV	Microspalax brevipes	0
6143073	male	780	P10	PPV	Zachvatkinia ovata	3
6143073	male	780	R1	PV	Microspalax brevipes	0
6143073	male	780	R1	PV	Zachvatkinia ovata	0
6143073	male	780	R1	AV	Microspalax brevipes	0
6143073	male	780	R1	AV	Zachvatkinia ovata	0
6143073	male	780	R2	PV	Microspalax brevipes	0
6143073	male	780	R2	PV	Zachvatkinia ovata	0
6143073	male	780	R2	AV	Microspalax brevipes	0
6143073	male	780	R2	AV	Zachvatkinia ovata	0
6143073	male	780	R3	PV	Microspalax brevipes	0
6143073	male	780	R3	PV	Zachvatkinia ovata	0
6143073	male	780	R3	AV	Microspalax brevipes	0
6143073	male	780	R3	AV	Zachvatkinia ovata	0
6143073	male	780	R4	PV	Microspalax brevipes	0
6143073	male	780	R4	PV	Zachvatkinia ovata	0
6143073	male	780	R4	AV	Microspalax brevipes	0
6143073	male	780	R4	AV	Zachvatkinia ovata	0
6143073	male	780	R5	PV	Microspalax brevipes	0
6143073	male	780	R5	PV	Zachvatkinia ovata	0
6143073	male	780	R5	AV	Microspalax brevipes	0
6143073	male	780	R5	AV	Zachvatkinia ovata	0
6143073	male	780	R6	PV	Microspalax brevipes	0
6143073	male	780	R6	PV	Zachvatkinia ovata	0
6143073	male	780	R6	AV	Microspalax brevipes	0
6143073	male	780	R6	AV	Zachvatkinia ovata	0
6195161	female	750	P1	DPV	Microspalax brevipes	0
6195161	female	750	P1	DPV	Zachvatkinia ovata	0
6195161	female	750	P1	PPV	Microspalax brevipes	0
6195161	female	750	P1	PPV	Zachvatkinia ovata	0
6195161	female	750	P1	DAV	Microspalax brevipes	2
6195161	female	750	P1	DAV	Zachvatkinia ovata	0
6195161	female	750	P1	PAV	Microspalax brevipes	0
6195161	female	750	P1	PAV	Zachvatkinia ovata	0
6195161	female	750	P2	DPV	Microspalax brevipes	3
6195161	female	750	P2	DPV	Zachvatkinia ovata	0
6195161	female	750	P2	PPV	Microspalax brevipes	1
6195161	female	750	P2	PPV	Zachvatkinia ovata	0
6195161	female	750	P2	DAV	Microspalax brevipes	3
6195161	female	750	P2	DAV	Zachvatkinia ovata	0
6195161	female	750	P2	PAV	Microspalax brevipes	0
6195161	female	750	P2	PAV	Zachvatkinia ovata	0
6195161	female	750	P3	DPV	Microspalax brevipes	20
6195161	female	750	P3	DPV	Zachvatkinia ovata	0
6195161	female	750	P3	PPV	Microspalax brevipes	0
6195161	female	750	P3	PPV	Zachvatkinia ovata	0
6195161	female	750	P3	DAV	Microspalax brevipes	6
6195161	female	750	P3	DAV	Zachvatkinia ovata	0
6195161	female	750	P3	PAV	Microspalax brevipes	0
6195161	female	750	P3	PAV	Zachvatkinia ovata	0
6195161	female	750	P4	DPV	Microspalax brevipes	75
6195161	female	750	P4	DPV	Zachvatkinia ovata	0
6195161	female	750	P4	PPV	Microspalax brevipes	0
6195161	female	750	P4	PPV	Zachvatkinia ovata	0
6195161	female	750	P4	DAV	Microspalax brevipes	14
6195161	female	750	P4	DAV	Zachvatkinia ovata	0
6195161	female	750	P4	PAV	Microspalax brevipes	0
6195161	female	750	P4	PAV	Zachvatkinia ovata	0
6195161	female	750	P5	DPV	Microspalax brevipes	999
6195161	female	750	P5	DPV	Zachvatkinia ovata	0
6195161	female	750	P5	PPV	Microspalax brevipes	5
6195161	female	750	P5	PPV	Zachvatkinia ovata	0
6195161	female	750	P5	DAV	Microspalax brevipes	37
6195161	female	750	P5	DAV	Zachvatkinia ovata	0
6195161	female	750	P5	PAV	Microspalax brevipes	5
6195161	female	750	P5	PAV	Zachvatkinia ovata	0
6195161	female	750	P6	DPV	Microspalax brevipes	999
6195161	female	750	P6	DPV	Zachvatkinia ovata	0
6195161	female	750	P6	PPV	Microspalax brevipes	5
6195161	female	750	P6	PPV	Zachvatkinia ovata	0
6195161	female	750	P6	DAV	Microspalax brevipes	8
6195161	female	750	P6	DAV	Zachvatkinia ovata	0
6195161	female	750	P6	PAV	Microspalax brevipes	1
6195161	female	750	P6	PAV	Zachvatkinia ovata	0
6195161	female	750	P7	DPV	Microspalax brevipes	999
6195161	female	750	P7	DPV	Zachvatkinia ovata	85
6195161	female	750	P7	PPV	Microspalax brevipes	7
6195161	female	750	P7	PPV	Zachvatkinia ovata	2
6195161	female	750	P7	DAV	Microspalax brevipes	0
6195161	female	750	P7	DAV	Zachvatkinia ovata	13
6195161	female	750	P7	PAV	Microspalax brevipes	0
6195161	female	750	P7	PAV	Zachvatkinia ovata	0
6195161	female	750	P8	DPV	Microspalax brevipes	75
6195161	female	750	P8	DPV	Zachvatkinia ovata	65
6195161	female	750	P8	PPV	Microspalax brevipes	1
6195161	female	750	P8	PPV	Zachvatkinia ovata	0
6195161	female	750	P8	DAV	Microspalax brevipes	0
6195161	female	750	P8	DAV	Zachvatkinia ovata	15
6195161	female	750	P8	PAV	Microspalax brevipes	0
6195161	female	750	P8	PAV	Zachvatkinia ovata	0
6195161	female	750	P9	DPV	Microspalax brevipes	8
6195161	female	750	P9	DPV	Zachvatkinia ovata	999
6195161	female	750	P9	PPV	Microspalax brevipes	21
6195161	female	750	P9	PPV	Zachvatkinia ovata	0
6195161	female	750	P9	DAV	Microspalax brevipes	0
6195161	female	750	P9	DAV	Zachvatkinia ovata	30
6195161	female	750	P9	PAV	Microspalax brevipes	0
6195161	female	750	P9	PAV	Zachvatkinia ovata	3
6195161	female	750	P10	DPV	Microspalax brevipes	0
6195161	female	750	P10	DPV	Zachvatkinia ovata	999
6195161	female	750	P10	PPV	Microspalax brevipes	5
6195161	female	750	P10	PPV	Zachvatkinia ovata	50
6195161	female	750	R1	PV	Microspalax brevipes	0
6195161	female	750	R1	PV	Zachvatkinia ovata	0
6195161	female	750	R1	AV	Microspalax brevipes	2
6195161	female	750	R1	AV	Zachvatkinia ovata	0
6195161	female	750	R2	PV	Microspalax brevipes	1
6195161	female	750	R2	PV	Zachvatkinia ovata	0
6195161	female	750	R2	AV	Microspalax brevipes	1
6195161	female	750	R2	AV	Zachvatkinia ovata	0
6195161	female	750	R3	PV	Microspalax brevipes	0
6195161	female	750	R3	PV	Zachvatkinia ovata	0
6195161	female	750	R3	AV	Microspalax brevipes	10
6195161	female	750	R3	AV	Zachvatkinia ovata	0
6195161	female	750	R4	PV	Microspalax brevipes	0
6195161	female	750	R4	PV	Zachvatkinia ovata	0
6195161	female	750	R4	AV	Microspalax brevipes	3
6195161	female	750	R4	AV	Zachvatkinia ovata	0
6195161	female	750	R5	PV	Microspalax brevipes	0
6195161	female	750	R5	PV	Zachvatkinia ovata	0
6195161	female	750	R5	AV	Microspalax brevipes	2
6195161	female	750	R5	AV	Zachvatkinia ovata	0
6195161	female	750	R6	PV	Microspalax brevipes	1
6195161	female	750	R6	PV	Zachvatkinia ovata	0
6195161	female	750	R6	AV	Microspalax brevipes	0
6195161	female	750	R6	AV	Zachvatkinia ovata	0
6188706	male	770	P1	DPV	Microspalax brevipes	0
6188706	male	770	P1	DPV	Zachvatkinia ovata	0
6188706	male	770	P1	PPV	Microspalax brevipes	0
6188706	male	770	P1	PPV	Zachvatkinia ovata	0
[truncated: 3,977 more rows]

## Sheet: Codes
bird sex	1 - male
	2 - female
feather type
	Primaries	P1	1
		P2	2
		P3	3
		P4	4
		P5	5
		P6	6
		P7	7
		P8	8
		P9	9
		P10	10
	Rectrices	R1	11
		R2	12
		R3	13
		R4	14
		R5	15
		R6	16
feather section	DPV	1	distal posterior vane	for primaries
	PPV	2	proximal posterior vane	for primaries
	DAV	3	distal anterior vane	for primaries
	PAV	4	proximal anterior vane	for primaries
	PV	5	posterior vane	only for rectrices
	AV	6	anterior vane	only for rectrices
mite species	1	Microspalax brevies
	2	Zachvatkinia ovata
mites number	999	> 100 mites were counted
	0	no mites were present
	777	mites were no counted because the feather was broken or missing
